# Supplementary material for: Genome-wide association studies and Mendelian randomization analyses for leisure sedentary behaviours
Source: PubMed Central journal article supplement (PMC7174427; doi:10.1038/s41467-020-15553-w), 2020-04-21
Supplement: 41467_2020_15553_MOESM1_ESM.pdf [file 41467_2020_15553_MOESM1_ESM.pdf]

# Genome-wide association studies and Mendelian randomization analyses for leisure sedentary behaviours

Van de Vegte *et al.*

# Supplementary Information

## Supplementary Figures

**Supplementary Figure 1:** Manhattan plot shows the results for the genome-wide associations with leisure television watching among individuals of European origin. Loci reaching genome-wide significance ( $P < 1 \times 10^{-8}$ ) are colored red.

**Supplementary Figure 2:** Manhattan plot shows the results for the genome-wide associations with leisure computer use among individuals of European origin. Loci reaching genome-wide significance ( $P < 1 \times 10^{-8}$ ) are colored red.

**Supplementary Figure 3:** Manhattan plot shows the results for the genome-wide associations with driving among individuals of European origin. Loci reaching genome-wide significance ( $P < 1 \times 10^{-8}$ ) are colored red.

**Supplementary Figure 4:** Scatter plot of leisure television watching genetic variants and coronary artery disease. The variants' effects on leisure television watching are displayed on the X-axis, the variants' effects on coronary artery disease on the Y-axis.

**Supplementary Figure 5:** Scatter plot of leisure computer use genetic variants and coronary artery disease. The variants' effects on leisure computer use are displayed on the X-axis, the variants' effects on coronary artery disease on the Y-axis.

**Supplementary Figure 6:** Scatter plot of driving genetic variants and coronary artery disease. The variants' effects on driving are displayed on the X-axis, the variants' effects on coronary artery disease on the Y-axis.

**Supplementary Figure 7:** Forest plot of leisure television watching genetic variants associations with coronary artery disease. The Mendelian Randomization effect size of television watching on coronary artery disease product are displayed on the X-axis. The different genetic variants for television watching are listed on the Y-axis.

**Supplementary Figure 8:** Forest plot of leisure computer use genetic variants associations with coronary artery disease. The Mendelian randomization effect size of television watching on coronary artery disease product are displayed on the X-axis. The different genetic variants for television watching are listed on the Y-axis.

**Supplementary Figure 9:** Forest plot of driving genetic variants associations with coronary artery disease. The Mendelian randomization effect size of television watching on coronary artery disease product are displayed on the X-axis. The different genetic variants for television watching are listed on the Y-axis.

**Supplementary Figure 10:** quantile–quantile (QQ) plot for leisure television watching.

**Supplementary Figure 11:** quantile–quantile (QQ) plot for leisure computer use.

**Supplementary Figure 12:** quantile–quantile (QQ) plot for driving.

## Supplementary Tables

**Supplementary Table 1:** Correlations among sedentary behaviour traits.

**Supplementary Table 2:** Association of sedentary behaviour traits with possible confounding factors in the observational analyses

**Supplementary Table 3:** Association of sedentary behaviour traits with new onset coronary artery disease incidence in the observational analyses.

**Supplementary Table 4:** Results of the two-sample Mendelian randomization analyses of sedentary traits on coronary artery disease, including the multivariable MR with education.

**Supplementary Table 5:** Heterogeneity ( $I^2$ , Cochran's Q, Rucker's Q and Q-Q'), pleiotropy (MR-Egger intercept) and weak instrument statistics in the MR-Egger analyses ( $I^2_{GX}$ ) in the examined associations between sedentary behaviours and coronary artery disease.

**Supplementary Table 6:** SNPs excluded from the outlier corrected MR-PRESSO analyses between sedentary behaviours and coronary artery disease.

**Supplementary Table 7:** Potentially pleiotropic SNPs in the Mendelian randomization between sedentary behaviours coronary artery disease.

**Supplementary Table 8:** Results from TwoSample Mendelian randomization analysis between education and sedentary behaviours traits.

**Supplementary Table 9:** Heterogeneity ( $I^2$ , Cochran's Q, Rucker's Q and Q-Q'), pleiotropy (MR-Egger intercept) and weak instrument statistics in the MR-Egger analysis ( $I^2_{GX}$ ) in the examined associations between education and sedentary behaviours.

**Supplementary Table 10:** SNPs excluded from the outlier corrected MR-PRESSO analyses between education and sedentary behaviours.

**Supplementary Table 11:**  $Q_{x1}$  and  $Q_{x2}$  and  $Q_a$  in the two-sample multivariable MR between sedentary behaviours, education and CAD.

**Supplementary Table 12:** Results of the additional two-sample Mendelian randomization analyses between sedentary behaviours and cardiovascular risk factors, and subsequent multivariable Mendelian randomization analyses on CAD.

### **Supplementary Discussion**

### **Supplementary References**

#### **Additional online data**

**Supplementary Data 1:** 193 Novel genome-wide sedentary behaviour SNPs (.xlsx).

**Supplementary Data 2:** Genetic correlation between sedentary behaviours, and previously performed GWAS's (.xlsx).

**Supplementary Data 3:** Sedentary behaviour variants associated with previously discovered variants (.xlsx).

**Supplementary Data 4:** List of coding variants (.xlsx).

**Supplementary Data 5:** List of functional eQTL genes (.xlsx).

**Supplementary Data 6:** List of DEPICT genes (.xlsx).

**Supplementary Data 7:** Results of gene sets discovered by DEPICT for sedentary behaviour and sedentary behaviour traits separately (.xlsx).

**Supplementary Data 8:** Results of enriched tissue sets discovered by DEPICT for sedentary behaviour and sedentary behaviour traits separately (.xlsx).

**Supplementary Data 9:** Genetic association estimates for the association between sedentary behaviours and coronary artery disease (.xlsx).

**Supplementary Data 10:** F-statistics and  $R^2$  of all instruments for the Mendelian randomization analysis between sedentary behaviours and coronary artery disease (.xlsx).

**Supplementary Data 11:** Inverse variance weighted Mendelian randomization estimates for the association between education and sedentary behaviours (.xlsx).

**Supplementary Data 12:** Genetic association estimates for the two-sample regression-based multivariable Mendelian randomization analyses estimating the effect of sedentary behaviours on coronary artery disease, adjusted for education (.xlsx).

**Supplementary Data 13:** Genetic association estimates for the two-sample regression-based multivariable Mendelian randomization analyses estimating the effect of sedentary behaviours on coronary artery disease, adjusted for cardiovascular risk factors. (.xlsx).

### Supplementary Figure 1: Manhattan plot leisure television watching

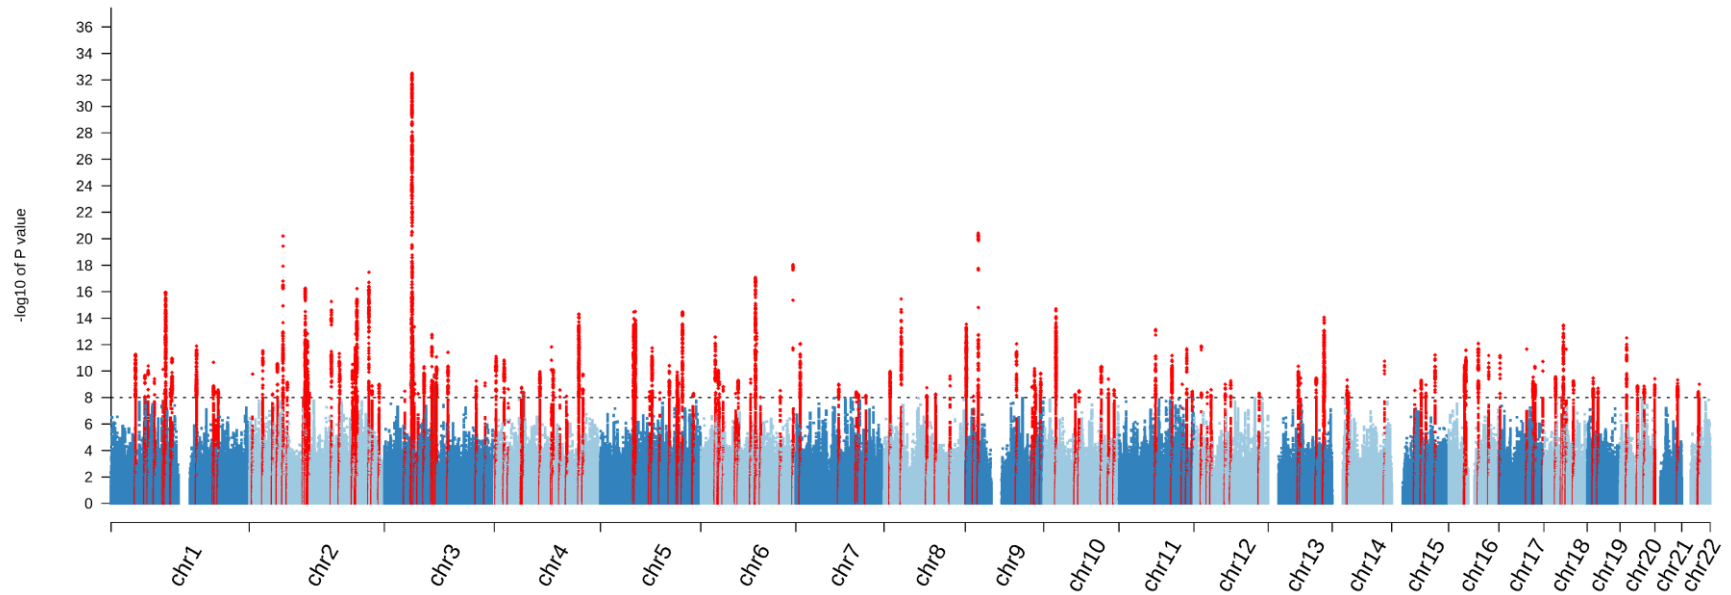

*Manhattan plot shows the results for the genome-wide associations with television watching among individuals of European origin. Loci reaching genome-wide significance ( $P < 1 \times 10^{-8}$ ) are colored red. We adopted a stringent (two-sided) genome-wide association threshold in order to account for testing three independent traits.*

## Supplementary Figure 2: Manhattan plot leisure computer use

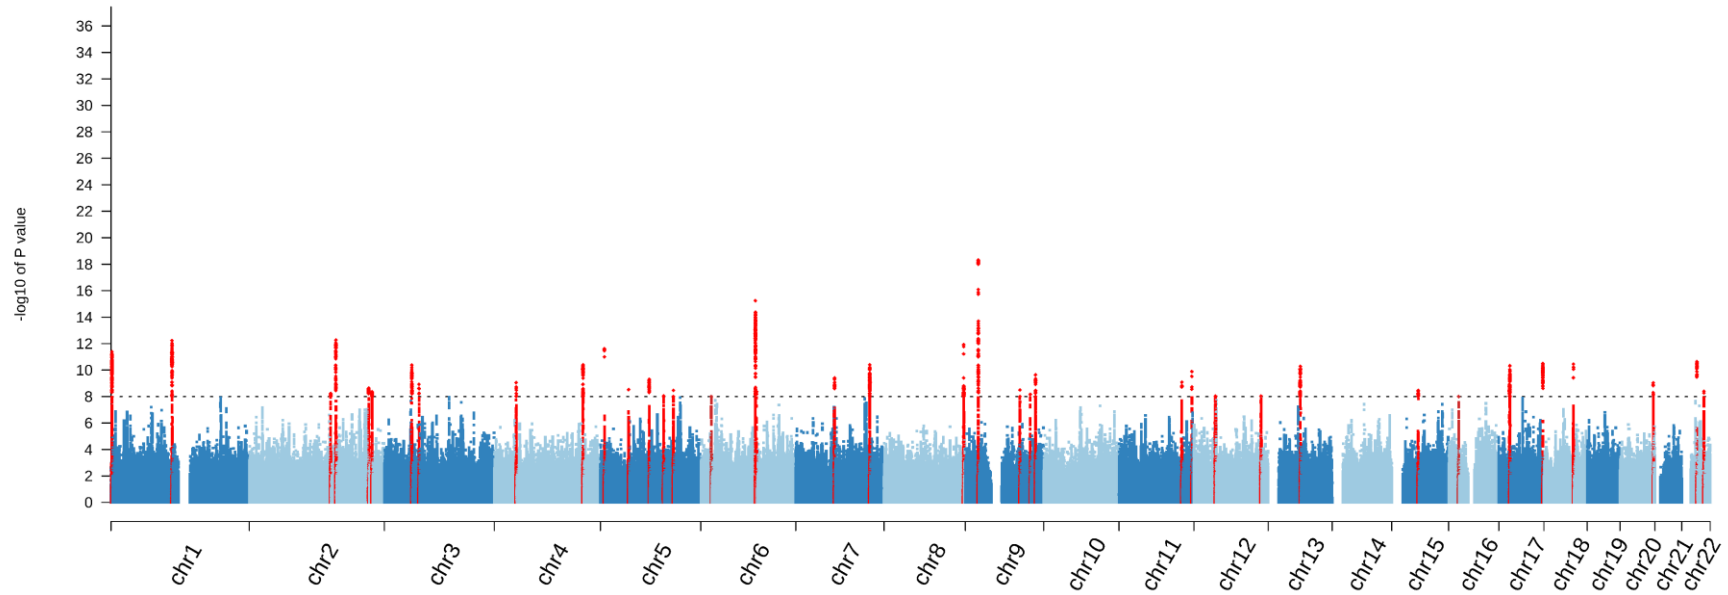

*Manhattan plot shows the results for the genome-wide associations with television watching among individuals of European origin. Loci reaching genome-wide significance ( $P < 1 \times 10^{-8}$ ) are colored red. We adopted a stringent (two-sided) genome-wide association threshold in order to account for testing three independent traits.*

### Supplementary Figure 3: Manhattan plot driving

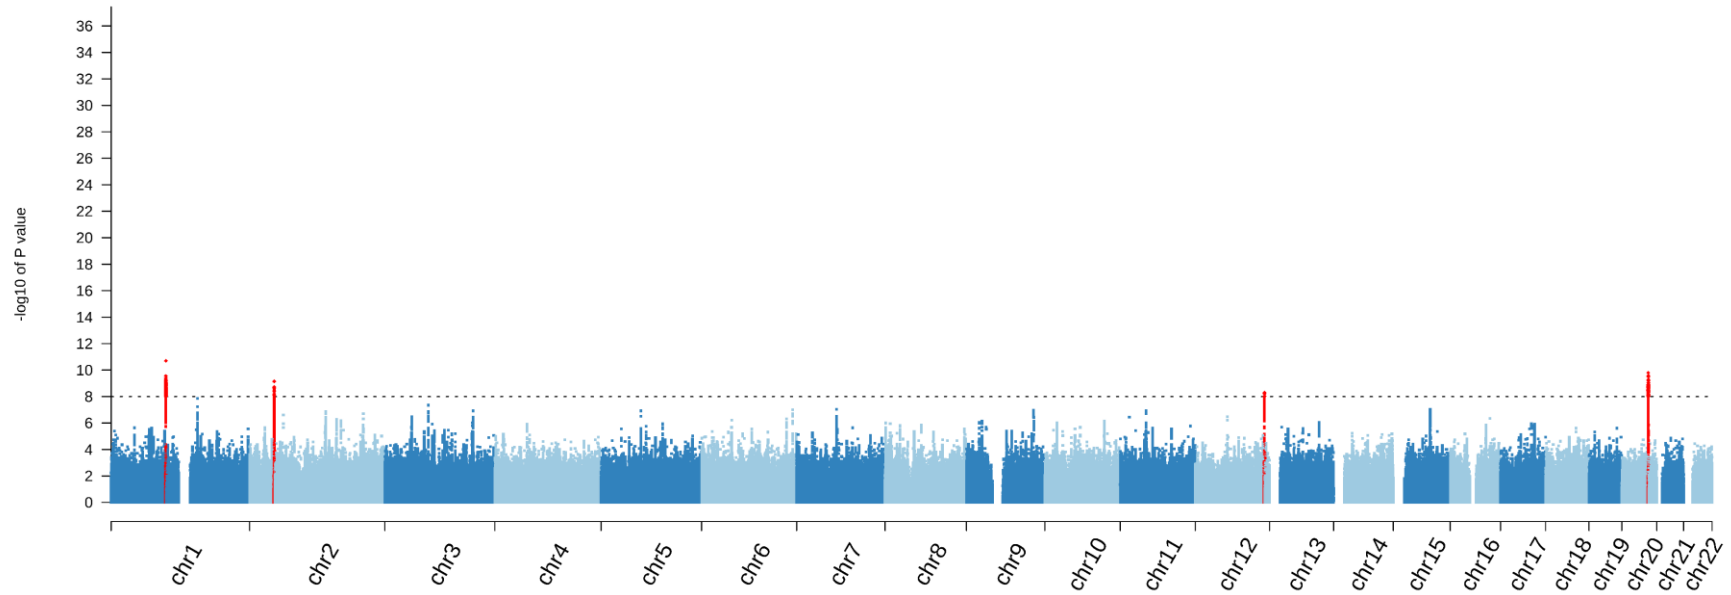

*Manhattan plot shows the results for the genome-wide associations with television watching among individuals of European origin. Loci reaching genome-wide significance ( $P < 1 \times 10^{-8}$ ) are colored red. We adopted a stringent (two-sided) genome-wide association threshold in order to account for testing three independent traits.*

#### Supplementary Figure 4: Scatter plot of leisure television watching genetic variants and coronary artery disease

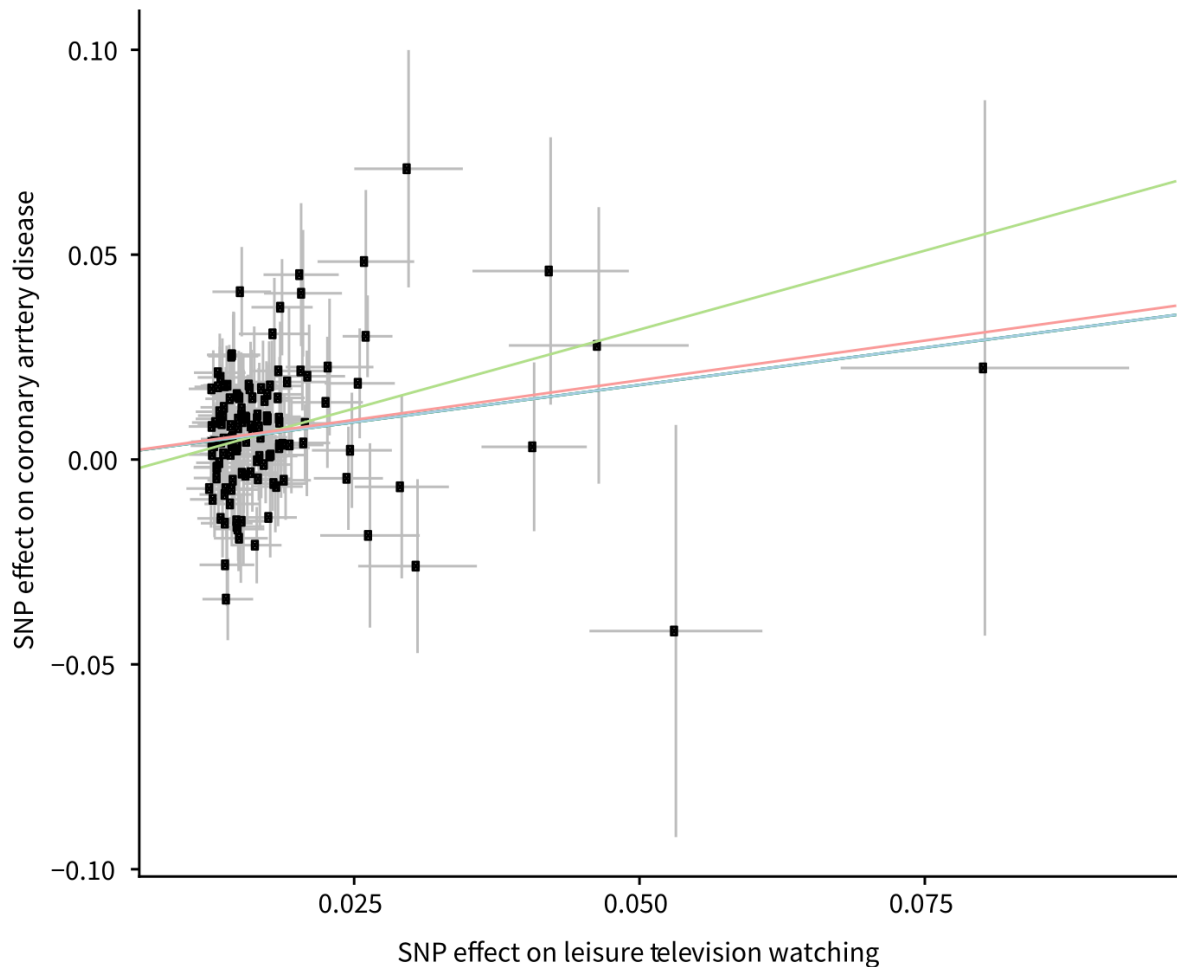

Scatter plot including the MR estimates between leisure television watching and coronary artery disease for the main analyses, in which a threshold of  $P < 1 \times 10^{-8}$  was used for the selection of variants. The variants' effect size and standard error on leisure television watching are displayed on the X-axis, the variants' effect size and standard error on coronary artery disease on the Y-axis.

The dark blue line is the regression line of the inverse variance weighted fixed effects meta-analysis, the light blue line of the inverse variance weighted random effects meta-analysis, the light green line of the MR-Egger analysis, the dark green line of the weighted median analysis and pink line of the weighted mode analysis.

$N=417,555$  biologically independent individuals from the UK Biobank were used to obtain effect estimates of the genetic variants associated with sedentary behaviours.  $N=184,305$  (60,801 cases, 123,504 controls) individuals were used to obtain effect estimates of the genetic variants associated with CAD. A total of 127 single SNP associations are shown.

SNP denotes single nucleotide polymorphism, MR denotes Mendelian randomization.

### Supplementary Figure 5: Scatter plot of leisure computer use genetic variants and coronary artery disease

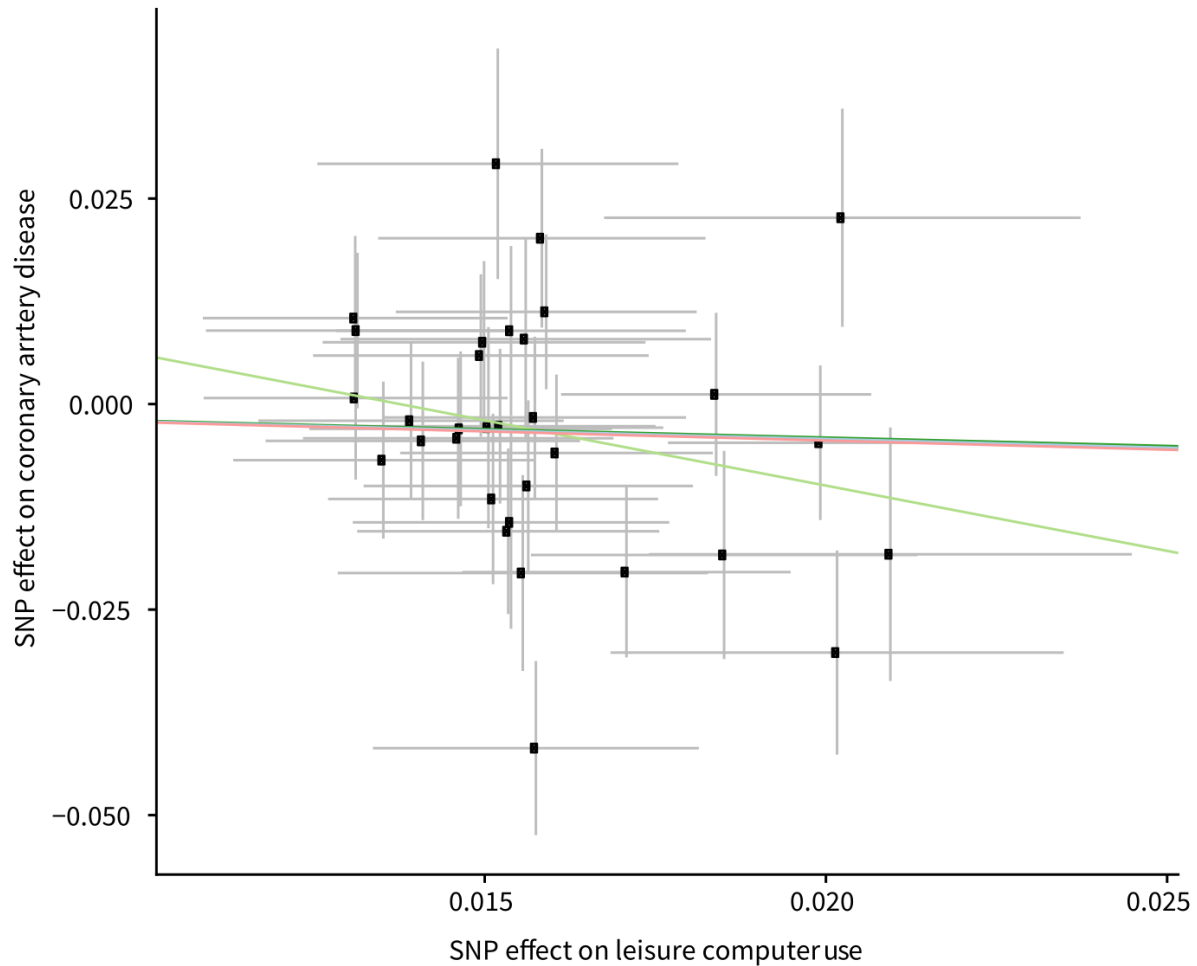

Scatter plot including the MR estimates between leisure computer use and coronary artery disease for the main analyses, in which a threshold of  $P < 1 \times 10^{-8}$  was used for the selection of variants. The variants' effect size and standard error on leisure computer use are displayed on the X-axis, the variants' effect size and standard error on coronary artery disease on the Y-axis. The dark blue line is the regression line of the inverse variance weighted fixed effects meta-analysis, the light blue line of the inverse variance weighted random effects meta-analysis, the light green line of the MR-Egger analysis, the dark green line of the weighted median analysis and pink line of the weighted mode analysis.

$N=414,927$  biologically independent individuals from the UK Biobank were used to obtain effect estimates of the genetic variants associated with computer use.  $N=184,305$  (60,801 cases, 123,504 controls) individuals were used to obtain effect estimates of the genetic variants associated with CAD. A total of 32 single SNP associations are shown.

SNP denotes single nucleotide polymorphism, MR denotes Mendelian randomization.



## Supplementary Figure 6: Scatter plot of driving genetic variants and coronary artery disease

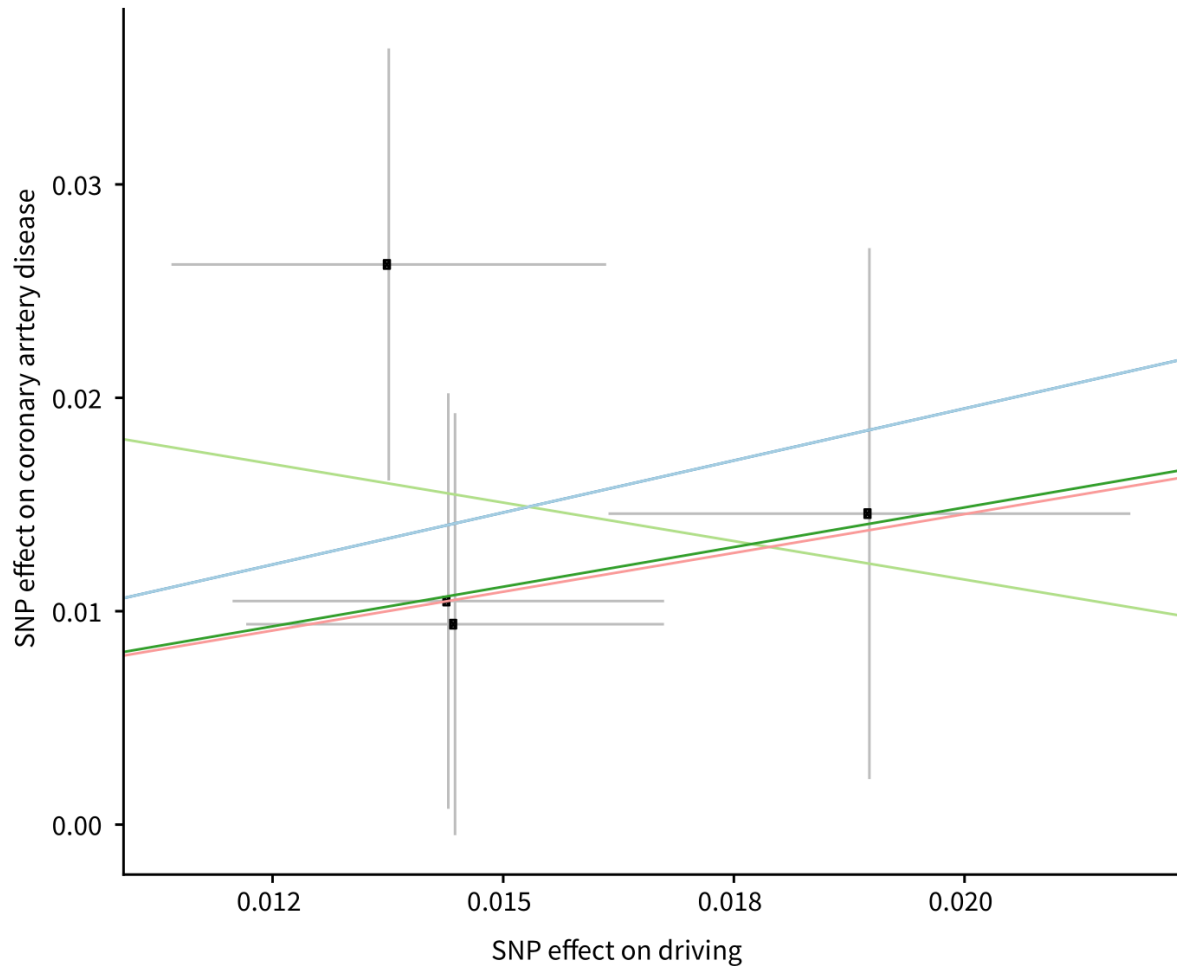

Scatter plot including the MR estimates between driving and coronary artery disease for the main analyses, in which a threshold of  $P < 1 \times 10^{-8}$  was used for the selection of variants. The variants' effect size and standard error on driving are displayed on the X-axis, the variants' effect size and standard error on coronary artery disease on the Y-axis.

The dark blue line is the regression line of the inverse variance weighted fixed effects meta-analysis, the light blue line of the inverse variance weighted random effects meta-analysis, the light green line of the MR-Egger analysis, the dark green line of the weighted median analysis and pink line of the weighted mode analysis.  $N=422,271$  biologically independent individuals from the UK Biobank were used to obtain effect estimates of the genetic variants associated with driving.  $N=184,305$  (60,801 cases, 123,504 controls) individuals were used to obtain effect estimates of the genetic variants associated with CAD. A total of 4 single SNP associations are shown.

SNP denotes single nucleotide polymorphism, MR denotes Mendelian randomization.

**Supplementary Figure 7: Forest plot of leisure television watching genetic variants associations with coronary artery disease.**

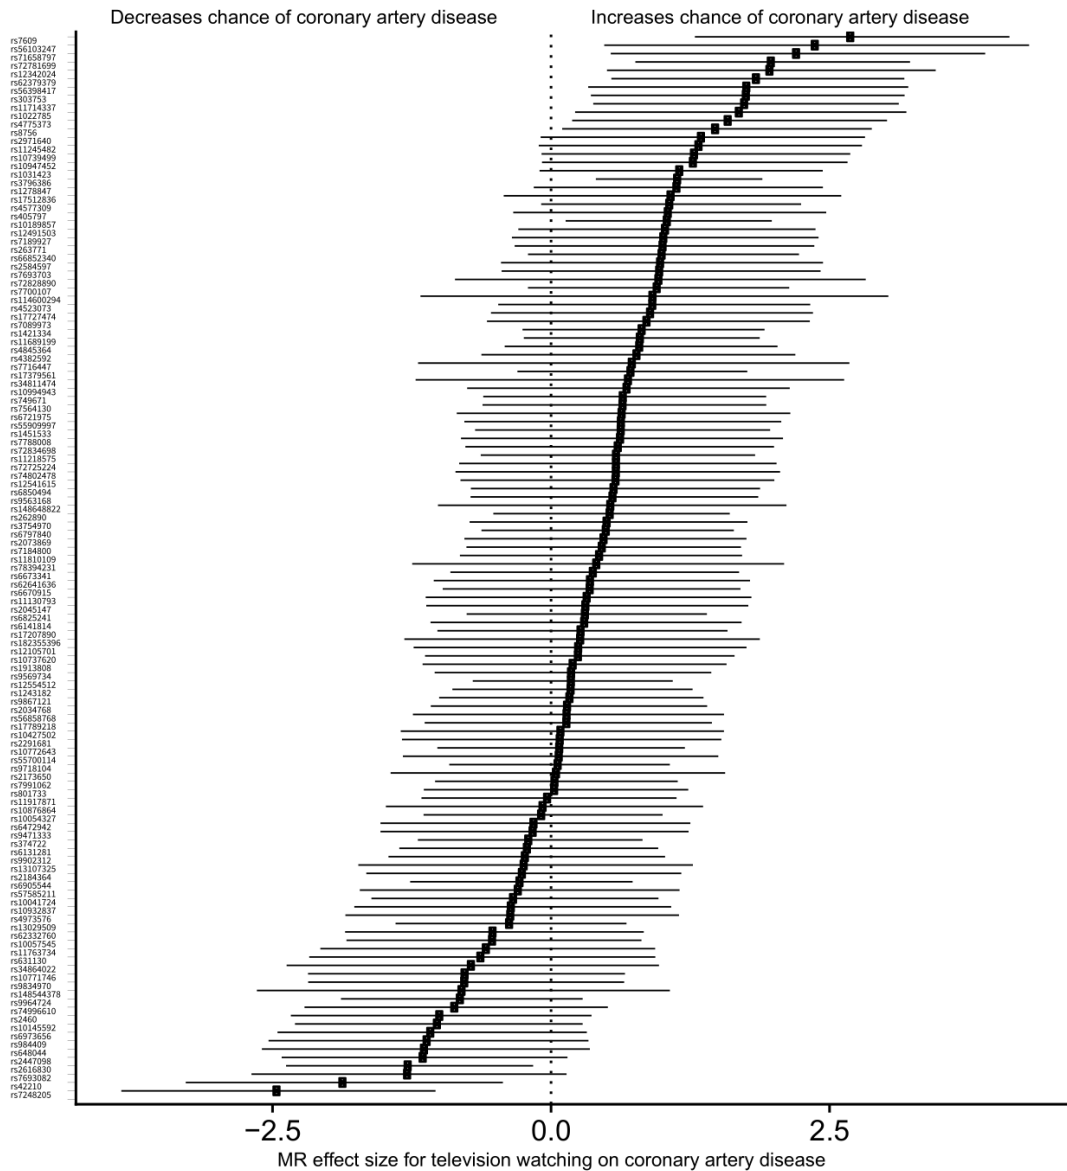

The Mendelian Randomization effect size and standard error of television watching on coronary artery disease product are displayed on the X-axis. The different genetic variants for television watching are listed on the Y-axis.

$N=417,555$  biologically independent individuals from the UK Biobank were used to obtain effect estimates of the genetic variants associated with sedentary behaviours.  $N=184,305$  (60,801 cases, 123,504 controls) individuals were used to obtain effect estimates of the genetic variants associated with CAD. A total of 127 single SNP associations are shown.

**Supplementary Figure 8: Forest plot of leisure computer use watching genetic variants associations with coronary artery disease.**

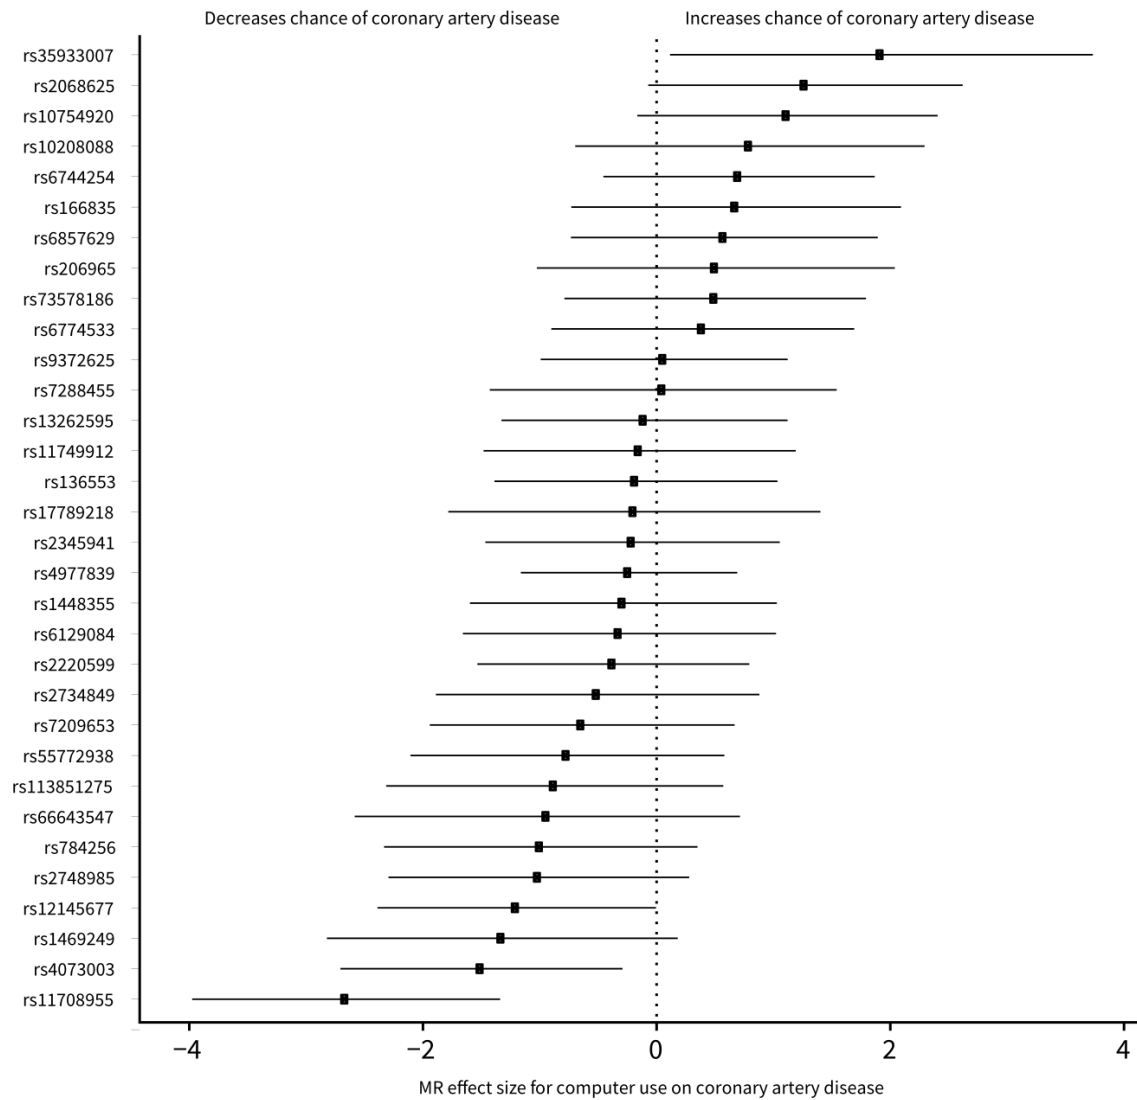

*The Mendelian Randomization effect size and standard error of computer use on coronary artery disease product are displayed on the X-axis. The different genetic variants for computer use are listed on the Y-axis. N=414,927 biologically independent individuals from the UK Biobank were used to obtain effect estimates of the genetic variants associated with computer use. N=184,305 (60,801 cases, 123,504 controls) individuals were used to obtain effect estimates of the genetic variants associated with CAD. A total of 32 single SNP associations are shown.*

**Supplementary Figure 9: Forest plot of driving genetic variants associations with coronary artery disease.**

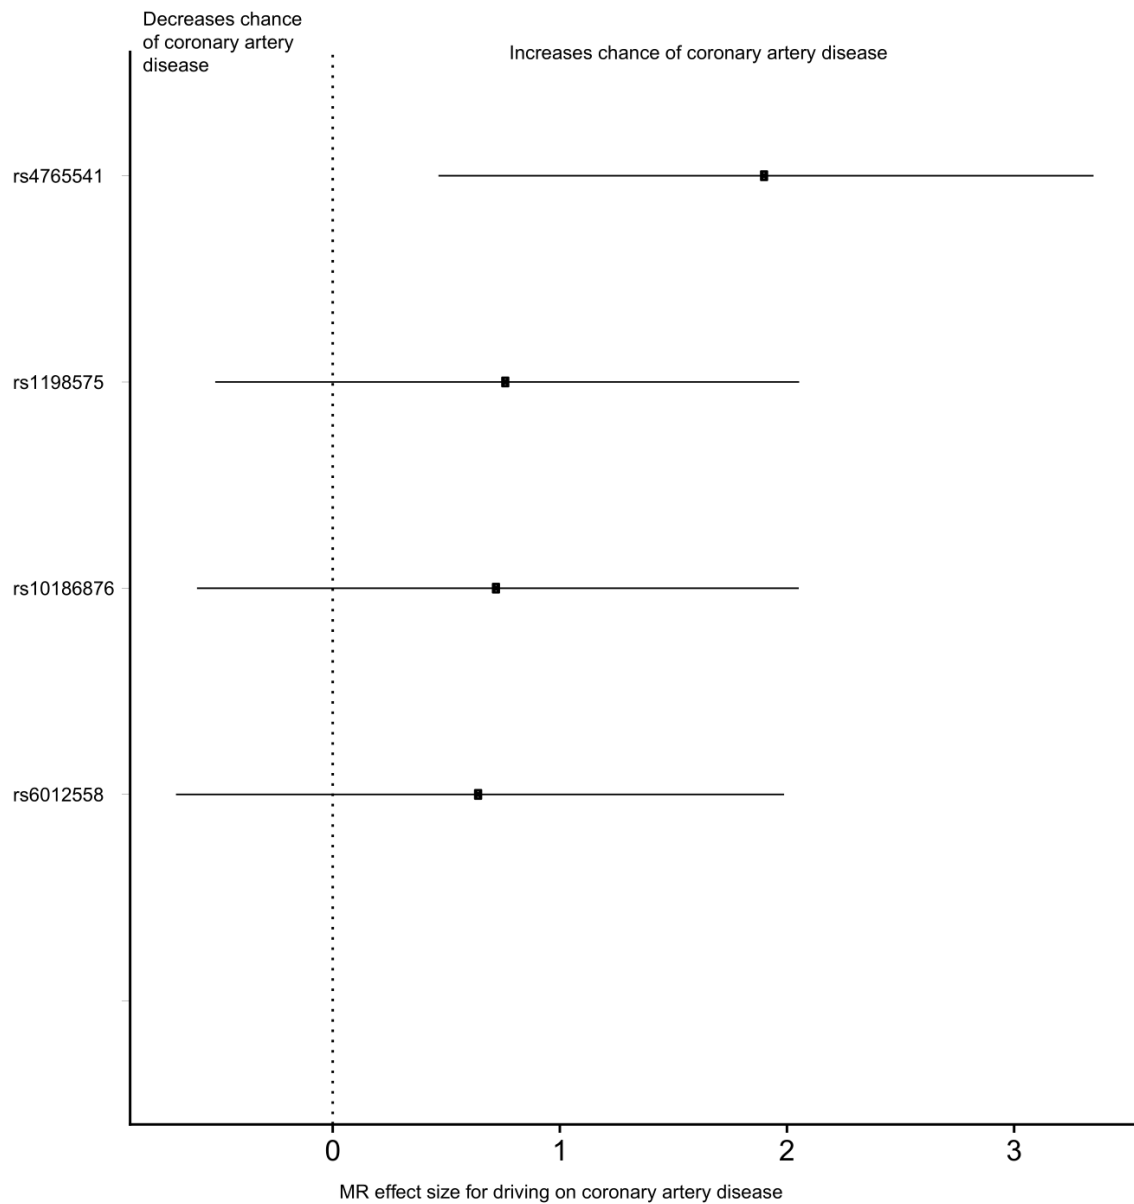

*The Mendelian Randomization effect size and standard error of driving on coronary artery disease product are displayed on the X-axis. The different genetic variants for driving are listed on the Y-axis. N=422,271 biologically independent individuals from the UK Biobank were used to obtain effect estimates of the genetic variants associated with driving. N=184,305 (60,801 cases, 123,504 controls) individuals were used to obtain effect estimates of the genetic variants associated with CAD. A total of 4 single SNP associations are shown.*

**Supplementary Figure 10: quantile–quantile (QQ) plot for leisure television watching.**

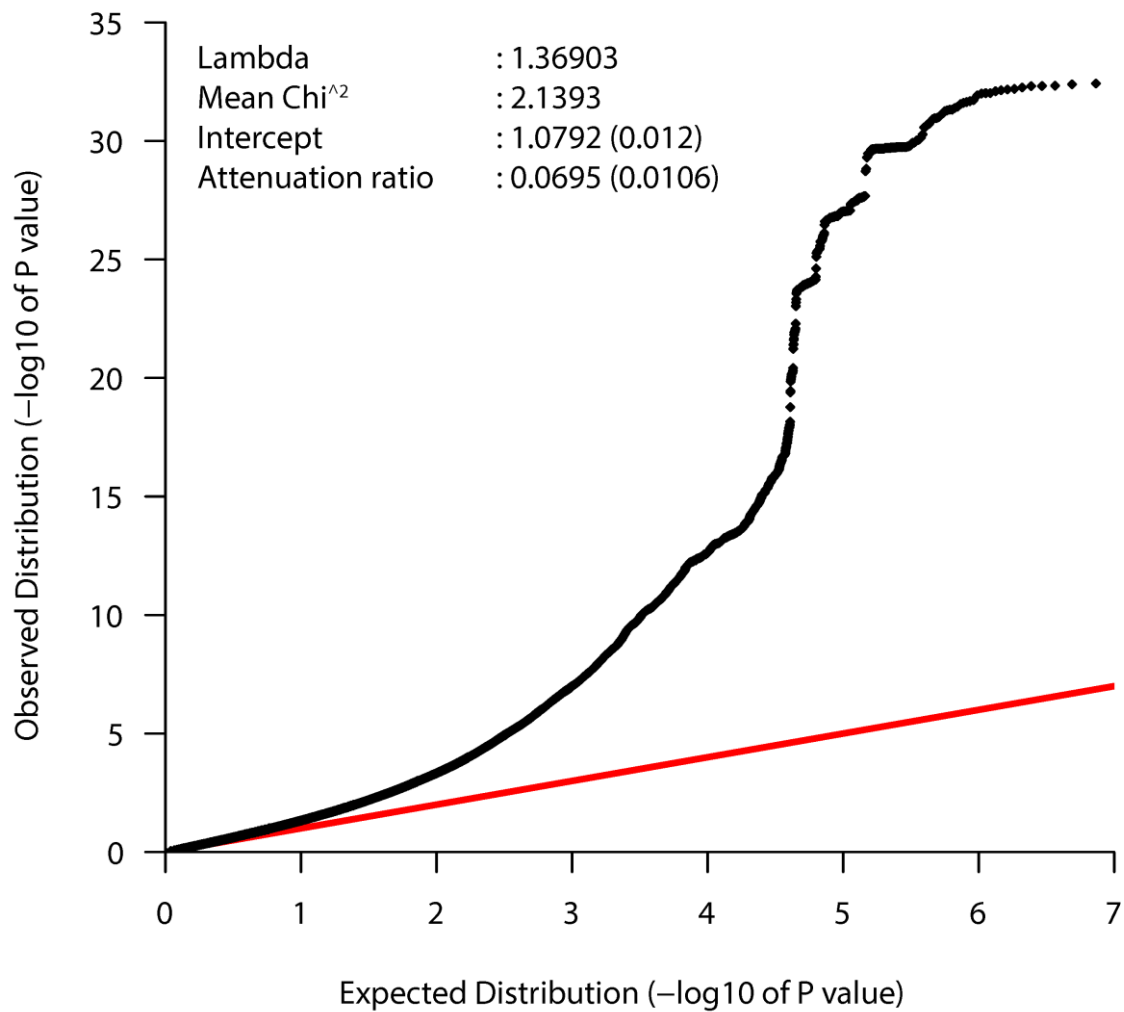

*Quantile–quantile (QQ) plot for the GWAS of leisure television watching. The genomic intercept indicated a possibility of population stratification. However, attenuation ratio statistic indicated polygenicity, not population stratification, to be the main driver of the observed inflation of test statistics for television watching. The X-axis shows the expected distribution in  $-\log_{10}(P\text{-value})$ . The Y-axis the observed distribution in  $-\log_{10}(P\text{-value})$ . The red line follows expected P-values from a theoretical  $\chi^2$ -distribution, whereas the black line follows the observed P-values in the current GWAS.*

**Supplementary Figure 11: quantile–quantile (QQ) plot for leisure computer use.**

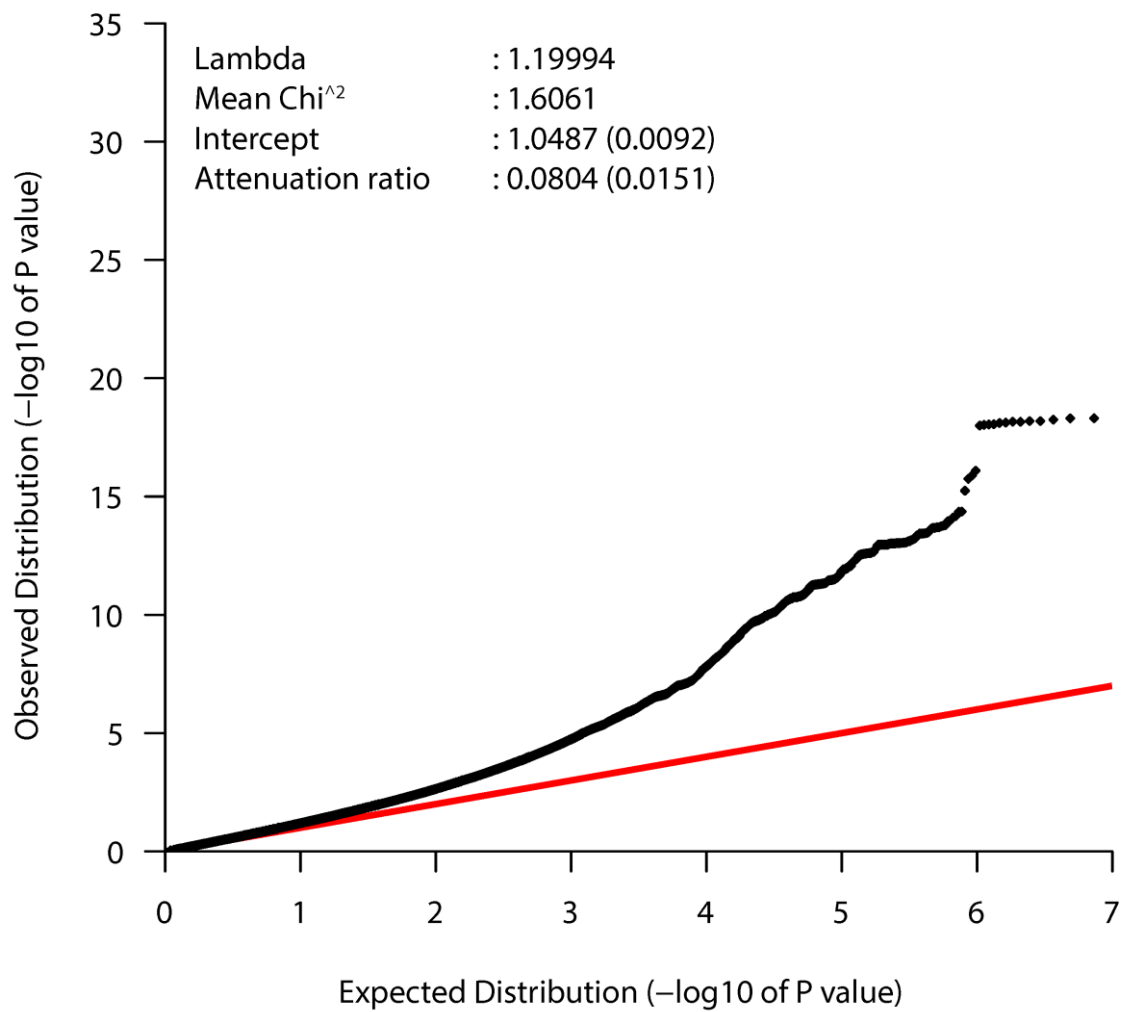

*Quantile–quantile (QQ) plot for the GWAS of leisure computer use. LD score regression intercepts showed no genomic inflation due to non-polygenic signals for computer use. The X-axis shows the expected distribution in  $-\log_{10}$ (P-value). The Y-axis the observed distribution in  $-\log_{10}$ (P-value). The red line follows expected P-values from a theoretical  $\chi^2$ -distribution, whereas the black line follows the observed P-values in the current GWAS.*

Supplementary Figure 12: quantile–quantile (QQ) plot for driving.

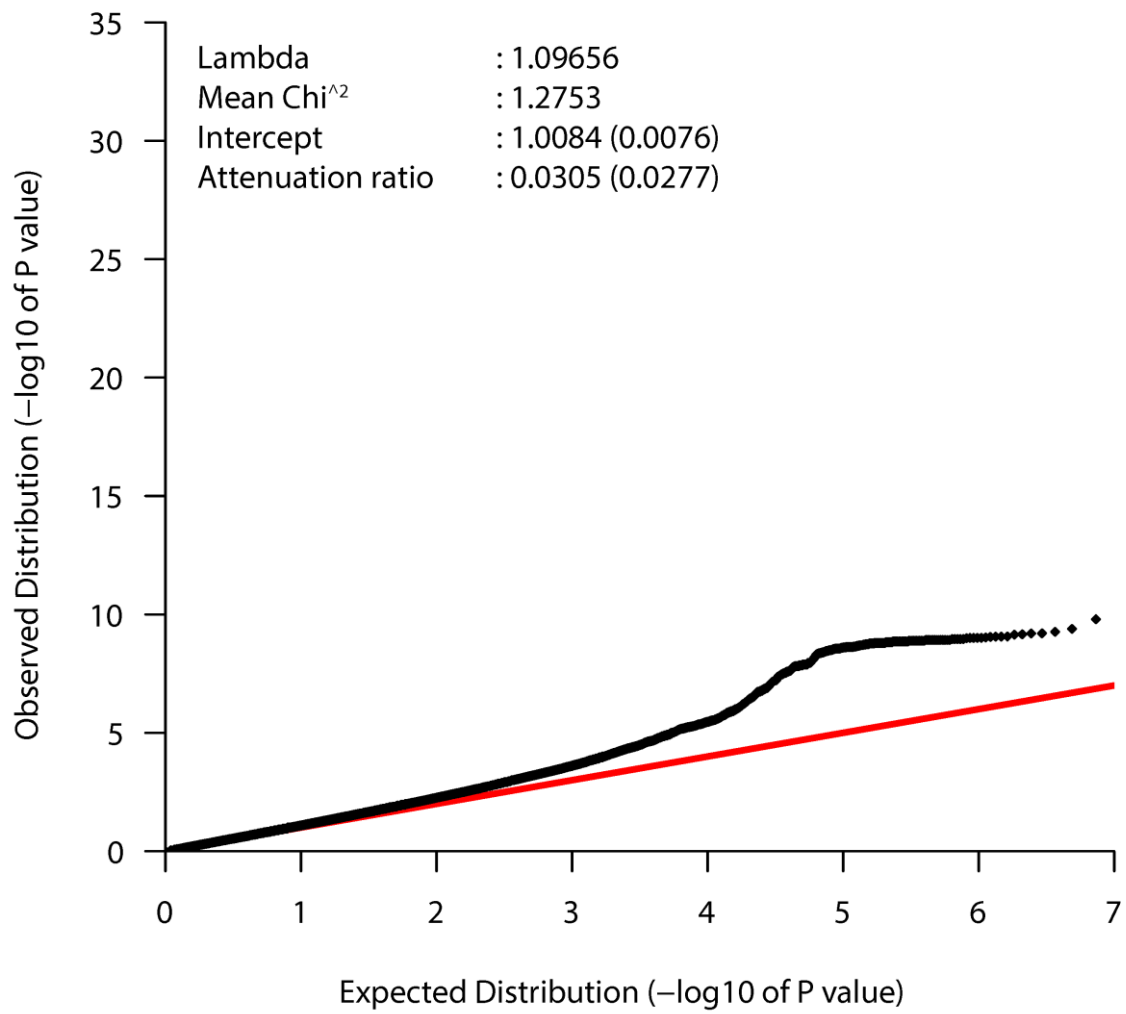

**Supplementary Table 1: Correlations among sedentary behaviour traits.**

|                            | <b><i>r</i> television watching</b> | <b>P-value television watching</b> | <b><i>r</i> computer use</b> | <b>P-value computer use</b> | <b><i>r</i> driving</b> | <b>P-value driving</b> |
|----------------------------|-------------------------------------|------------------------------------|------------------------------|-----------------------------|-------------------------|------------------------|
| <b>Television watching</b> | 1                                   | 0                                  | -0.0518                      | 1.01E-230                   | -0.0254                 | 4.81E-57               |
| <b>Computer use</b>        | -0.0518                             | 1.01E-230                          | 1                            | 0                           | 0.052                   | 1.91E-232              |
| <b>Driving</b>             | -0.0254                             | 4.81E-57                           | 0.052                        | 1.91E-232                   | 1                       | 0                      |

*The associations between sedentary phenotypes were assessed by performing Spearman's rank correlation. A two-sided  $P < 0.05$  was considered statistically significant.  $r$  = correlation coefficient.*



**Supplementary Table 2: Association of sedentary behaviour traits with possible confounding factors in the observational analyses**

| outcome             | beta   | se    | OR    | OR min<br>(95% CI) | OR plus<br>(95% CI) | P-value  | N      | N <sub>control</sub> | N <sub>outcome</sub> | (Pseudo)<br>R <sup>2</sup> | Z       | Estimated<br>Pvalue |
|---------------------|--------|-------|-------|--------------------|---------------------|----------|--------|----------------------|----------------------|----------------------------|---------|---------------------|
| Television watching |        |       |       |                    |                     |          |        |                      |                      |                            |         |                     |
| Age                 | 1.065  | 0.008 | NA    | NA                 | NA                  | 0        | 417555 | NA                   | NA                   | 0.0423                     | 135.779 | 2.78E-4006          |
| Sex                 | 0.013  | 0.002 | 1.013 | 1.009              | 1.017               | 4.85E-10 | 417555 | 224627               | 192928               | 0.0001                     | 6.224   | 4.85E-10            |
| BMI                 | 0.667  | 0.005 | NA    | NA                 | NA                  | 0        | 415670 | NA                   | NA                   | 0.0469                     | 142.998 | 2.68E-4443          |
| Diabetes mellitus   | 0.301  | 0.005 | 1.351 | 1.338              | 1.364               | 0        | 417555 | 403078               | 14477                | 0.0275                     | 59.777  | 1.55E-778           |
| Hypertension        | 0.257  | 0.003 | 1.294 | 1.285              | 1.302               | 0        | 417555 | 382950               | 34605                | 0.0231                     | 74.810  | 5.67E-1218          |
| Smoking             | 0.046  | 0.001 | NA    | NA                 | NA                  | 0        | 417454 | NA                   | NA                   | 0.0111                     | 68.580  | 5.85E-1024          |
| Physical activity   | 0.063  | 0.001 | NA    | NA                 | NA                  | 0        | 416853 | NA                   | NA                   | 0.0234                     | 99.932  | 2.35E-2171          |
| Alcohol use         | 0.247  | 0.019 | NA    | NA                 | NA                  | 3.15E-40 | 349165 | NA                   | NA                   | 0.0005                     | 13.279  | 3.08E-40            |
| TDI                 | 0.056  | 0.001 | NA    | NA                 | NA                  | 0        | 417054 | NA                   | NA                   | 0.0079                     | 57.485  | 3.75E-720           |
| Education years     | -1.032 | 0.005 | NA    | NA                 | NA                  | 0        | 416172 | NA                   | NA                   | 0.1094                     | 226.102 | 3.60E-11104         |
| HDL                 | -0.028 | 0.000 | NA    | NA                 | NA                  | 0        | 356374 | NA                   | NA                   | 0.0127                     | 67.627  | 9.22E-996           |
| LDL                 | 0.009  | 0.001 | NA    | NA                 | NA                  | 6.56E-24 | 388595 | NA                   | NA                   | 0.0003                     | 10.084  | 6.52E-24            |
| TC                  | 0.000  | 0.001 | NA    | NA                 | NA                  | 6.77E-01 | 389316 | NA                   | NA                   | 0.0000                     | 0.417   | 6.77E-1             |
| Triglyceride        | 0.083  | 0.001 | NA    | NA                 | NA                  | 0        | 389008 | NA                   | NA                   | 0.0158                     | 78.943  | 5.47E-1356          |
| SBP                 | 1.446  | 0.018 | NA    | NA                 | NA                  | 0        | 416777 | NA                   | NA                   | 0.0155                     | 80.911  | 2.62E-1424          |
| DBP                 | 0.453  | 0.009 | NA    | NA                 | NA                  | 0        | 416779 | NA                   | NA                   | 0.0067                     | 52.964  | 1.07E-611           |
| Computer use        |        |       |       |                    |                     |          |        |                      |                      |                            |         |                     |
| Age                 | -0.457 | 0.010 | NA    | NA                 | NA                  | 0        | 414927 | NA                   | NA                   | 0.0050                     | 45.867  | 2.56E-459           |
| Sex                 | 0.231  | 0.003 | 1.260 | 1.253              | 1.266               | 0        | 414927 | 221999               | 192928               | 0.0140                     | 86.113  | 5.16E-1613          |
| BMI                 | 0.270  | 0.006 | NA    | NA                 | NA                  | 0        | 413052 | NA                   | NA                   | 0.0049                     | 45.286  | 8.08E-448           |
| Diabetes mellitus   | 0.080  | 0.006 | 1.083 | 1.070              | 1.097               | 0        | 414927 | 400450               | 14477                | 0.0013                     | 12.974  | 1.71E-38            |
| Hypertension        | -0.012 | 0.005 | 0.988 | 0.979              | 0.997               | 1.11E-02 | 414927 | 380322               | 34605                | 0.0000                     | 2.540   | 1.11E-2             |
| Smoking             | 0.009  | 0.001 | NA    | NA                 | NA                  | 2.67E-29 | 414825 | NA                   | NA                   | 0.0003                     | 11.238  | 2.65E-29            |
| Physical activity   | 0.000  | 0.001 | NA    | NA                 | NA                  | 6.65E-01 | 414218 | NA                   | NA                   | 0.0000                     | 0.433   | 6.65E-1             |

|                   |        |       |       |       |       |           |        |        |        |        |         |            |
|-------------------|--------|-------|-------|-------|-------|-----------|--------|--------|--------|--------|---------|------------|
| Alcohol use       | 0.468  | 0.023 | NA    | NA    | NA    | 8.51E-91  | 346888 | NA     | NA     | 0.0012 | 20.213  | 7.54E-91   |
| TDI               | -0.006 | 0.001 | NA    | NA    | NA    | 5.84E-07  | 414425 | NA     | NA     | 0.0001 | 4.997   | 5.84E-7    |
| Education years   | 0.670  | 0.006 | NA    | NA    | NA    | 0         | 414927 | NA     | NA     | 0.0297 | 112.733 | 1.54E-2762 |
| HDL               | -0.028 | 0.001 | NA    | NA    | NA    | 0         | 357195 | NA     | NA     | 0.0084 | 55.054  | 1.02E-660  |
| LDL               | -0.010 | 0.001 | NA    | NA    | NA    | 1.58E-18  | 389499 | NA     | NA     | 0.0002 | 8.785   | 1.57E-18   |
| TC                | -0.031 | 0.001 | NA    | NA    | NA    | 7.71E-100 | 390224 | NA     | NA     | 0.0012 | 21.216  | 6.76E-100  |
| Triglyceride      | 0.041  | 0.001 | NA    | NA    | NA    | 1.07E-207 | 389918 | NA     | NA     | 0.0024 | 30.773  | 6.02E-208  |
| SBP               | -0.193 | 0.022 | NA    | NA    | NA    | 9.34E-18  | 414164 | NA     | NA     | 0.0002 | 8.582   | 9.31E-18   |
| DBP               | 0.201  | 0.011 | NA    | NA    | NA    | 6.63E-79  | 414166 | NA     | NA     | 0.0009 | 18.811  | 6.14E-79   |
| Driving           |        |       |       |       |       |           |        |        |        |        |         |            |
| Age               | -1.025 | 0.012 | NA    | NA    | NA    | 0         | 414546 | NA     | NA     | 0.0179 | 86.811  | 3.24E-1639 |
| Sex               | 0.458  | 0.004 | 1.580 | 1.569 | 1.592 | 0         | 414546 | 221618 | 192928 | 0.0326 | 123.123 | 1.02E-3294 |
| BMI               | 0.366  | 0.007 | NA    | NA    | NA    | 0         | 412656 | NA     | NA     | 0.0064 | 51.586  | 2.20E-580  |
| Diabetes mellitus | 0.022  | 0.008 | 1.022 | 1.007 | 1.039 | 5.38E-03  | 414546 | 400069 | 14477  | 0.0001 | 2.783   | 5.38E-3    |
| Hypertension      | -0.094 | 0.006 | 0.910 | 0.899 | 0.921 | 0         | 414546 | 379941 | 34605  | 0.0011 | 15.487  | 4.25E-54   |
| Smoking           | 0.012  | 0.001 | NA    | NA    | NA    | 4.03E-32  | 414444 | NA     | NA     | 0.0003 | 11.798  | 3.99E-32   |
| Physical activity | -0.015 | 0.001 | NA    | NA    | NA    | 7.10E-57  | 413866 | NA     | NA     | 0.0006 | 15.895  | 6.83E-57   |
| Alcohol use       | 1.356  | 0.028 | NA    | NA    | NA    | 0         | 346546 | NA     | NA     | 0.0069 | 49.023  | 2.26E-524  |
| TDI               | -0.068 | 0.001 | NA    | NA    | NA    | 0         | 414054 | NA     | NA     | 0.0054 | 47.337  | 4.49E-489  |
| Education years   | -0.039 | 0.007 | NA    | NA    | NA    | 4.81E-08  | 413193 | NA     | NA     | 0.0001 | 5.458   | 4.80E-8    |
| HDL               | -0.045 | 0.001 | NA    | NA    | NA    | 0         | 353924 | NA     | NA     | 0.0150 | 73.531  | 9.44E-1177 |
| LDL               | -0.004 | 0.001 | NA    | NA    | NA    | 1.31E-03  | 385944 | NA     | NA     | 0.0000 | 3.214   | 1.31E-3    |
| TC                | -0.036 | 0.002 | NA    | NA    | NA    | 3.97E-93  | 386656 | NA     | NA     | 0.0011 | 20.476  | 3.54E-93   |
| Triglyceride      | 0.060  | 0.002 | NA    | NA    | NA    | 0         | 386356 | NA     | NA     | 0.0038 | 38.139  | 2.85E-318  |
| SBP               | 0.389  | 0.027 | NA    | NA    | NA    | 9.14E-48  | 413767 | NA     | NA     | 0.0005 | 14.521  | 8.90E-48   |
| DBP               | 0.581  | 0.013 | NA    | NA    | NA    | 0         | 413769 | NA     | NA     | 0.0050 | 45.633  | 1.17E-454  |

Associations with potential confounders were assessed using linear regressions analyses. Logistic regression analyses were used in case of binary outcomes. In case logistic regressions were performed, odds ratio's (OR) and 95% confidence intervals (CI). In addition, in case of logistic regressions, we show the pseudo  $R^2$  instead of the actual  $R^2$  (as shown for the linear regression analyses). P-values were on some occasions estimated to be zero using conventional methods. We therefore show the Z-values as well as estimated P-values using a mantissa plus exponent method. A two-sided  $P < 0.05$  was considered statistically significant.

*Associations were tested for all a priori chosen confounder used in model 3 of the Cox regression analyses. In addition, associations were tested for traits that were included in the multivariable MR to control for potentially pleiotropic effects in the MR. BMI stands for body mass index, TDI for Townsend Deprivation Index, SBP for systolic blood pressure, DBP for diastolic blood pressure, hypertension for a medical history of hypertension, HDL for high density lipoprotein, LDL for low density lipoprotein and TC for total cholesterol. NA stands for not applicable.*

**Supplementary Table 3: Association of sedentary behaviour traits with new onset coronary artery disease incidence in the observational analyses.**

| exposure            | Model   | beta   | se    | HR    | HR min (95% CI) | HR plus (95% CI) | P-value   | Nsubjects | Nfailures |
|---------------------|---------|--------|-------|-------|-----------------|------------------|-----------|-----------|-----------|
| Television watching | Model 1 | 0.179  | 0.005 | 1.196 | 1.183           | 1.209            | 2.71E-227 | 400364    | 12136     |
| Computer use        | Model 1 | -0.006 | 0.007 | 0.994 | 0.980           | 1.009            | 0.440     | 397641    | 12085     |
| Driving             | Model 1 | 0.029  | 0.008 | 1.029 | 1.013           | 1.046            | 0.001     | 397315    | 12081     |
| Television watching | Model 2 | 0.117  | 0.006 | 1.124 | 1.111           | 1.136            | 2.37E-88  | 400364    | 12136     |
| Computer use        | Model 2 | -0.026 | 0.008 | 0.974 | 0.959           | 0.989            | 0.001     | 397641    | 12085     |
| Driving             | Model 2 | 0.024  | 0.009 | 1.024 | 1.007           | 1.041            | 0.006     | 397315    | 12081     |
| Television watching | Model 3 | 0.033  | 0.007 | 1.034 | 1.020           | 1.048            | 1.15E-06  | 331402    | 9755      |
| Computer use        | Model 3 | -0.008 | 0.008 | 0.992 | 0.976           | 1.009            | 0.345     | 330117    | 9748      |
| Driving             | Model 3 | 0.011  | 0.009 | 1.011 | 0.993           | 1.029            | 0.244     | 328802    | 9697      |

*Cox regression analysis was performed to investigate the association between different sedentary behaviours and new onset CAD events using three models. A two-sided  $P < 0.05$  was considered statistically significant, no adjustments were made for multiple testing. The models included:*

*Model 1: univariable analysis*

*Model 2: age and sex*

*Model 3: age, sex, body mass index, smoking status, hypertension, diabetes, Townsend deprivation index as proxy for income, physical activity levels, alcohol use per week and years of education.*

*HR = Hazard ratio. CI = Confidence interval. Nsubjects = the amount of subjects included in the analyses, Nfailures = the amount of participants who had CAD events.*

**Supplementary Table 4: Results of the two-sample Mendelian randomization analyses of sedentary traits on coronary artery disease, including the multivariable MR with education.**

| exposure   | method                                     | nsnp | beta   | se    | P-value  | OR    | 95% CI min | 95% CI plus | P-value cut-off |
|------------|--------------------------------------------|------|--------|-------|----------|-------|------------|-------------|-----------------|
| Television | IVW (fixed effects)                        | 127  | 0.364  | 0.059 | 7.28E-10 | 1.439 | 1.282      | 1.616       | 1.00E-08        |
| Television | IVW (random effects)                       | 127  | 0.364  | 0.073 | 5.63E-07 | 1.439 | 1.248      | 1.660       | 1.00E-08        |
| Television | MR Egger                                   | 127  | 0.771  | 0.334 | 2.26E-02 | 2.161 | 1.124      | 4.156       | 1.00E-08        |
| Television | IVW (excluding pleiotropic education SNPs) | 113  | 0.363  | 0.065 | 1.93E-08 | 1.437 | 1.266      | 1.631       | 1.00E-08        |
| Television | IVW (excluding pleiotropic SNPs)           | 93   | 0.408  | 0.072 | 1.26E-08 | 1.504 | 1.307      | 1.731       | 1.00E-08        |
| Television | MR-PRESSO                                  | 127  | 0.364  | 0.073 | 1.85E-06 | 1.439 | 1.248      | 1.660       | 1.00E-08        |
| Television | MR-PRESSO (Outlier-corrected)              | 126  | 0.383  | 0.070 | 2.56E-07 | 1.467 | 1.278      | 1.683       | 1.00E-08        |
| Television | Multivariable (adjusted for education)     | 126  | 0.349  | 0.133 | 8.70E-03 | 1.418 | 1.092      | 1.840       | 1.00E-08        |
| Television | Weighted median                            | 127  | 0.364  | 0.092 | 7.82E-05 | 1.439 | 1.201      | 1.723       | 1.00E-08        |
| Television | Weighted mode                              | 127  | 0.387  | 0.251 | 1.26E-01 | 1.473 | 0.900      | 2.410       | 1.00E-08        |
| Computer   | IVW (fixed effects)                        | 32   | -0.212 | 0.118 | 7.16E-02 | 0.809 | 0.642      | 1.019       | 1.00E-08        |
| Computer   | IVW (random effects)                       | 32   | -0.212 | 0.153 | 1.66E-01 | 0.809 | 0.599      | 1.092       | 1.00E-08        |
| Computer   | MR Egger                                   | 32   | -1.588 | 1.249 | 2.13E-01 | 0.204 | 0.018      | 2.364       | 1.00E-08        |
| Computer   | IVW (excluding pleiotropic education SNPs) | 28   | -0.115 | 0.128 | 3.67E-01 | 0.891 | 0.693      | 1.145       | 1.00E-08        |
| Computer   | IVW (excluding pleiotropic SNPs)           | 27   | -0.116 | 0.131 | 3.75E-01 | 0.891 | 0.689      | 1.151       | 1.00E-08        |
| Computer   | MR-PRESSO                                  | 32   | -0.212 | 0.153 | 1.76E-01 | 0.809 | 0.599      | 1.092       | 1.00E-08        |
| Computer   | MR-PRESSO (Outlier-corrected)              | 31   | -0.135 | 0.136 | 3.30E-01 | 0.874 | 0.669      | 1.141       | 1.00E-08        |
| Computer   | Multivariable (adjusted for education)     | 32   | 0.157  | 0.252 | 5.34E-01 | 1.170 | 0.714      | 1.916       | 1.00E-08        |
| Computer   | Weighted median                            | 32   | -0.204 | 0.172 | 2.35E-01 | 0.816 | 0.582      | 1.142       | 1.00E-08        |
| Computer   | Weighted mode                              | 32   | -0.222 | 0.316 | 4.88E-01 | 0.801 | 0.431      | 1.489       | 1.00E-08        |
| Driving    | IVW (fixed effects)                        | 4    | 0.975  | 0.343 | 4.46E-03 | 2.651 | 1.354      | 5.191       | 1.00E-08        |
| Driving    | IVW (random effects)                       | 4    | 0.975  | 0.343 | 4.46E-03 | 2.651 | 1.354      | 5.191       | 1.00E-08        |
| Driving    | MR Egger                                   | 4    | -0.721 | 2.849 | 8.24E-01 | 0.486 | 0.002      | 129.317     | 1.00E-08        |
| Driving    | IVW (excluding pleiotropic education SNPs) | 3    | 1.053  | 0.402 | 8.86E-03 | 2.866 | 1.303      | 6.303       | 1.00E-08        |

|            |                                            |     |        |       |          |       |       |         |          |
|------------|--------------------------------------------|-----|--------|-------|----------|-------|-------|---------|----------|
| Driving    | IVW (excluding pleiotropic SNPs)           | 2   | 0.688  | 0.480 | 1.52E-01 | 1.990 | 0.776 | 5.103   | 1.00E-08 |
| Driving    | MR-PRESSO                                  | 4   | 0.975  | 0.285 | 4.17E-02 | 2.651 | 1.517 | 4.633   | 1.00E-08 |
| Driving    | MR-PRESSO (Outlier-corrected)              | NA  | NA     | NA    | NA       | NA    | NA    | NA      | 1.00E-08 |
| Driving    | Multivariable (adjusted for education)     | 4   | 1.196  | 0.474 | 1.17E-02 | 3.306 | 1.305 | 8.378   | 1.00E-08 |
| Driving    | Weighted median                            | 4   | 0.743  | 0.407 | 6.78E-02 | 2.102 | 0.947 | 4.667   | 1.00E-08 |
| Driving    | Weighted mode                              | 4   | 0.727  | 0.542 | 2.72E-01 | 2.070 | 0.716 | 5.983   | 1.00E-08 |
| Television | IVW (fixed effects)                        | 182 | 0.359  | 0.052 | 3.98E-12 | 1.431 | 1.293 | 1.584   | 5.00E-08 |
| Television | IVW (random effects)                       | 182 | 0.359  | 0.063 | 9.87E-09 | 1.431 | 1.266 | 1.618   | 5.00E-08 |
| Television | MR Egger                                   | 182 | 0.623  | 0.276 | 2.50E-02 | 1.865 | 1.086 | 3.202   | 5.00E-08 |
| Television | IVW (excluding pleiotropic education SNPs) | 168 | 0.357  | 0.055 | 1.03E-10 | 1.429 | 1.282 | 1.592   | 5.00E-08 |
| Television | IVW (excluding pleiotropic SNPs)           | 148 | 0.387  | 0.059 | 7.64E-11 | 1.473 | 1.311 | 1.655   | 5.00E-08 |
| Television | MR-PRESSO                                  | 182 | 0.359  | 0.063 | 4.07E-08 | 1.431 | 1.266 | 1.618   | 5.00E-08 |
| Television | MR-PRESSO (Outlier-corrected)              | 181 | 0.373  | 0.061 | 5.93E-09 | 1.452 | 1.288 | 1.637   | 5.00E-08 |
| Television | Multivariable (adjusted for education)     | 179 | 0.315  | 0.107 | 3.19E-03 | 1.370 | 1.111 | 1.689   | 5.00E-08 |
| Television | Weighted median                            | 182 | 0.364  | 0.080 | 5.74E-06 | 1.439 | 1.230 | 1.685   | 5.00E-08 |
| Television | Weighted mode                              | 182 | 0.422  | 0.264 | 1.12E-01 | 1.525 | 0.909 | 2.560   | 5.00E-08 |
| Computer   | IVW (fixed effects)                        | 47  | -0.240 | 0.101 | 1.79E-02 | 0.787 | 0.645 | 0.960   | 5.00E-08 |
| Computer   | IVW (random effects)                       | 47  | -0.240 | 0.131 | 6.70E-02 | 0.787 | 0.609 | 1.017   | 5.00E-08 |
| Computer   | MR Egger                                   | 47  | -1.130 | 0.874 | 2.03E-01 | 0.323 | 0.058 | 1.793   | 5.00E-08 |
| Computer   | IVW (excluding pleiotropic education SNPs) | 43  | -0.175 | 0.108 | 1.04E-01 | 0.839 | 0.680 | 1.037   | 5.00E-08 |
| Computer   | IVW (excluding pleiotropic SNPs)           | 41  | -0.175 | 0.110 | 1.13E-01 | 0.840 | 0.676 | 1.042   | 5.00E-08 |
| Computer   | MR-PRESSO                                  | 47  | -0.247 | 0.129 | 6.10E-02 | 0.781 | 0.607 | 1.005   | 5.00E-08 |
| Computer   | MR-PRESSO (Outlier-corrected)              | 45  | -0.149 | 0.110 | 1.82E-01 | 0.862 | 0.694 | 1.069   | 5.00E-08 |
| Computer   | Multivariable (adjusted for education)     | 47  | -0.057 | 0.210 | 7.87E-01 | 0.945 | 0.625 | 1.427   | 5.00E-08 |
| Computer   | Weighted median                            | 47  | -0.224 | 0.154 | 1.47E-01 | 0.799 | 0.591 | 1.082   | 5.00E-08 |
| Computer   | Weighted mode                              | 47  | -0.242 | 0.316 | 4.47E-01 | 0.785 | 0.423 | 1.458   | 5.00E-08 |
| Driving    | IVW (fixed effects)                        | 5   | 0.780  | 0.314 | 1.31E-02 | 2.182 | 1.178 | 4.039   | 5.00E-08 |
| Driving    | IVW (random effects)                       | 5   | 0.780  | 0.318 | 1.41E-02 | 2.182 | 1.170 | 4.068   | 5.00E-08 |
| Driving    | MR Egger                                   | 5   | -0.540 | 3.235 | 8.78E-01 | 0.583 | 0.001 | 330.296 | 5.00E-08 |
| Driving    | IVW (excluding pleiotropic education SNPs) | 4   | 0.784  | 0.358 | 2.87E-02 | 2.189 | 1.085 | 4.417   | 5.00E-08 |

|            |                                            |     |        |       |          |       |       |        |          |
|------------|--------------------------------------------|-----|--------|-------|----------|-------|-------|--------|----------|
| Driving    | IVW (excluding pleiotropic SNPs)           | 3   | 0.435  | 0.410 | 2.89E-01 | 1.544 | 0.691 | 3.449  | 5.00E-08 |
| Driving    | MR-PRESSO                                  | 5   | 0.780  | 0.318 | 7.02E-02 | 2.182 | 1.170 | 4.068  | 5.00E-08 |
| Driving    | MR-PRESSO (Outlier-corrected)              | NA  | NA     | NA    | NA       | NA    | NA    | NA     | 5.00E-08 |
| Driving    | Multivariable (adjusted for education)     | 5   | 0.888  | 0.540 | 9.97E-02 | 2.431 | 0.844 | 7.002  | 5.00E-08 |
| Driving    | Weighted median                            | 5   | 0.728  | 0.422 | 8.45E-02 | 2.071 | 0.906 | 4.735  | 5.00E-08 |
| Driving    | Weighted mode                              | 5   | 0.721  | 0.522 | 2.39E-01 | 2.057 | 0.740 | 5.719  | 5.00E-08 |
| Television | IVW (fixed effects)                        | 214 | 0.354  | 0.049 | 3.30E-13 | 1.425 | 1.296 | 1.568  | 1.00E-07 |
| Television | IVW (random effects)                       | 214 | 0.354  | 0.058 | 7.88E-10 | 1.425 | 1.273 | 1.596  | 1.00E-07 |
| Television | MR Egger                                   | 214 | 0.564  | 0.256 | 2.85E-02 | 1.758 | 1.065 | 2.904  | 1.00E-07 |
| Television | IVW (excluding pleiotropic education SNPs) | 200 | 0.352  | 0.052 | 8.48E-12 | 1.422 | 1.286 | 1.574  | 1.00E-07 |
| Television | IVW (excluding pleiotropic SNPs)           | 180 | 0.378  | 0.055 | 6.69E-12 | 1.459 | 1.310 | 1.625  | 1.00E-07 |
| Television | MR-PRESSO                                  | 214 | 0.354  | 0.058 | 3.83E-09 | 1.425 | 1.273 | 1.596  | 1.00E-07 |
| Television | MR-PRESSO (Outlier-corrected)              | 213 | 0.367  | 0.056 | 5.37E-10 | 1.444 | 1.293 | 1.613  | 1.00E-07 |
| Television | Multivariable (adjusted for education)     | 211 | 0.342  | 0.099 | 5.23E-04 | 1.408 | 1.161 | 1.709  | 1.00E-07 |
| Television | Weighted median                            | 214 | 0.364  | 0.074 | 9.31E-07 | 1.439 | 1.244 | 1.665  | 1.00E-07 |
| Television | Weighted mode                              | 214 | 0.433  | 0.246 | 7.92E-02 | 1.542 | 0.953 | 2.497  | 1.00E-07 |
| Computer   | IVW (fixed effects)                        | 56  | -0.294 | 0.095 | 1.99E-03 | 0.745 | 0.618 | 0.898  | 1.00E-07 |
| Computer   | IVW (random effects)                       | 56  | -0.294 | 0.124 | 1.76E-02 | 0.745 | 0.585 | 0.950  | 1.00E-07 |
| Computer   | MR Egger                                   | 56  | -1.012 | 0.800 | 2.11E-01 | 0.364 | 0.076 | 1.744  | 1.00E-07 |
| Computer   | IVW (excluding pleiotropic education SNPs) | 52  | -0.244 | 0.100 | 1.50E-02 | 0.784 | 0.644 | 0.954  | 1.00E-07 |
| Computer   | IVW (excluding pleiotropic SNPs)           | 50  | -0.247 | 0.103 | 1.60E-02 | 0.781 | 0.639 | 0.955  | 1.00E-07 |
| Computer   | MR-PRESSO                                  | 56  | -0.300 | 0.122 | 1.72E-02 | 0.741 | 0.584 | 0.941  | 1.00E-07 |
| Computer   | MR-PRESSO (Outlier-corrected)              | 53  | -0.179 | 0.102 | 8.40E-02 | 0.836 | 0.684 | 1.020  | 1.00E-07 |
| Computer   | Multivariable (adjusted for education)     | 56  | -0.168 | 0.197 | 3.95E-01 | 0.846 | 0.575 | 1.244  | 1.00E-07 |
| Computer   | Weighted median                            | 56  | -0.237 | 0.144 | 1.01E-01 | 0.789 | 0.595 | 1.047  | 1.00E-07 |
| Computer   | Weighted mode                              | 56  | -0.262 | 0.307 | 3.96E-01 | 0.769 | 0.422 | 1.404  | 1.00E-07 |
| Driving    | IVW (fixed effects)                        | 7   | 0.831  | 0.262 | 1.49E-03 | 2.296 | 1.375 | 3.835  | 1.00E-07 |
| Driving    | IVW (random effects)                       | 7   | 0.831  | 0.262 | 1.49E-03 | 2.296 | 1.375 | 3.835  | 1.00E-07 |
| Driving    | MR Egger                                   | 7   | 0.424  | 1.392 | 7.73E-01 | 1.528 | 0.100 | 23.407 | 1.00E-07 |
| Driving    | IVW (excluding pleiotropic education SNPs) | 6   | 0.843  | 0.285 | 3.13E-03 | 2.324 | 1.328 | 4.066  | 1.00E-07 |

|            |                                            |     |        |       |          |       |       |        |          |
|------------|--------------------------------------------|-----|--------|-------|----------|-------|-------|--------|----------|
| Driving    | IVW (excluding pleiotropic SNPs)           | 5   | 0.655  | 0.310 | 3.45E-02 | 1.925 | 1.049 | 3.531  | 1.00E-07 |
| Driving    | MR-PRESSO                                  | 7   | 0.831  | 0.219 | 9.09E-03 | 2.296 | 1.494 | 3.531  | 1.00E-07 |
| Driving    | MR-PRESSO (Outlier-corrected)              | NA  | NA     | NA    | NA       | NA    | NA    | NA     | 1.00E-07 |
| Driving    | Multivariable (adjusted for education)     | 7   | 0.938  | 0.326 | 4.05E-03 | 2.556 | 1.348 | 4.846  | 1.00E-07 |
| Driving    | Weighted median                            | 7   | 0.767  | 0.333 | 2.12E-02 | 2.153 | 1.121 | 4.135  | 1.00E-07 |
| Driving    | Weighted mode                              | 7   | 0.757  | 0.445 | 1.39E-01 | 2.132 | 0.892 | 5.097  | 1.00E-07 |
| Television | IVW (fixed effects)                        | 372 | 0.312  | 0.040 | 6.20E-15 | 1.367 | 1.263 | 1.478  | 1.00E-06 |
| Television | IVW (random effects)                       | 372 | 0.312  | 0.047 | 3.23E-11 | 1.367 | 1.246 | 1.499  | 1.00E-06 |
| Television | MR Egger                                   | 372 | 0.460  | 0.197 | 2.03E-02 | 1.584 | 1.076 | 2.332  | 1.00E-06 |
| Television | IVW (excluding pleiotropic education SNPs) | 358 | 0.308  | 0.042 | 1.46E-13 | 1.360 | 1.254 | 1.476  | 1.00E-06 |
| Television | IVW (excluding pleiotropic SNPs)           | 338 | 0.319  | 0.043 | 1.72E-13 | 1.376 | 1.264 | 1.498  | 1.00E-06 |
| Television | MR-PRESSO                                  | 372 | 0.312  | 0.047 | 1.15E-10 | 1.367 | 1.246 | 1.499  | 1.00E-06 |
| Television | MR-PRESSO (Outlier-corrected)              | 371 | 0.323  | 0.045 | 3.66E-12 | 1.381 | 1.265 | 1.509  | 1.00E-06 |
| Television | Multivariable (adjusted for education)     | 367 | 0.259  | 0.078 | 9.39E-04 | 1.295 | 1.111 | 1.510  | 1.00E-06 |
| Television | Weighted median                            | 372 | 0.320  | 0.061 | 1.91E-07 | 1.377 | 1.221 | 1.553  | 1.00E-06 |
| Television | Weighted mode                              | 372 | 0.381  | 0.210 | 7.05E-02 | 1.464 | 0.970 | 2.210  | 1.00E-06 |
| Computer   | IVW (fixed effects)                        | 112 | -0.216 | 0.073 | 2.97E-03 | 0.805 | 0.698 | 0.929  | 1.00E-06 |
| Computer   | IVW (random effects)                       | 112 | -0.216 | 0.084 | 1.02E-02 | 0.805 | 0.683 | 0.950  | 1.00E-06 |
| Computer   | MR Egger                                   | 112 | -0.358 | 0.462 | 4.40E-01 | 0.699 | 0.282 | 1.730  | 1.00E-06 |
| Computer   | IVW (excluding pleiotropic education SNPs) | 108 | -0.183 | 0.075 | 1.46E-02 | 0.833 | 0.719 | 0.964  | 1.00E-06 |
| Computer   | IVW (excluding pleiotropic SNPs)           | 106 | -0.183 | 0.076 | 1.57E-02 | 0.832 | 0.717 | 0.966  | 1.00E-06 |
| Computer   | MR-PRESSO                                  | 112 | -0.212 | 0.083 | 1.23E-02 | 0.809 | 0.687 | 0.952  | 1.00E-06 |
| Computer   | MR-PRESSO (Outlier-corrected)              | 110 | -0.162 | 0.077 | 3.91E-02 | 0.851 | 0.731 | 0.990  | 1.00E-06 |
| Computer   | Multivariable (adjusted for education)     | 112 | -0.132 | 0.115 | 2.50E-01 | 0.876 | 0.700 | 1.098  | 1.00E-06 |
| Computer   | Weighted median                            | 112 | -0.206 | 0.104 | 4.86E-02 | 0.814 | 0.663 | 0.999  | 1.00E-06 |
| Computer   | Weighted mode                              | 112 | -0.214 | 0.269 | 4.28E-01 | 0.807 | 0.476 | 1.369  | 1.00E-06 |
| Driving    | IVW (fixed effects)                        | 26  | 0.238  | 0.157 | 1.29E-01 | 1.269 | 0.933 | 1.727  | 1.00E-06 |
| Driving    | IVW (random effects)                       | 26  | 0.238  | 0.227 | 2.93E-01 | 1.269 | 0.814 | 1.979  | 1.00E-06 |
| Driving    | MR Egger                                   | 26  | 0.675  | 1.154 | 5.64E-01 | 1.964 | 0.204 | 18.861 | 1.00E-06 |
| Driving    | IVW (excluding pleiotropic education SNPs) | 25  | 0.206  | 0.162 | 2.02E-01 | 1.229 | 0.895 | 1.687  | 1.00E-06 |



|            |                                            |     |        |       |          |       |       |       |          |
|------------|--------------------------------------------|-----|--------|-------|----------|-------|-------|-------|----------|
| Driving    | IVW (excluding pleiotropic SNPs)           | 23  | 0.048  | 0.169 | 7.78E-01 | 1.049 | 0.753 | 1.461 | 1.00E-06 |
| Driving    | MR-PRESSO                                  | 26  | 0.135  | 0.223 | 5.49E-01 | 1.145 | 0.739 | 1.773 | 1.00E-06 |
| Driving    | MR-PRESSO (Outlier-corrected)              | NA  | NA     | NA    | NA       | NA    | NA    | NA    | 1.00E-06 |
| Driving    | Multivariable (adjusted for education)     | 26  | -0.060 | 0.275 | 8.29E-01 | 0.942 | 0.549 | 1.616 | 1.00E-06 |
| Driving    | Weighted median                            | 26  | 0.324  | 0.257 | 2.09E-01 | 1.382 | 0.835 | 2.290 | 1.00E-06 |
| Driving    | Weighted mode                              | 26  | 0.557  | 0.469 | 2.46E-01 | 1.745 | 0.696 | 4.377 | 1.00E-06 |
| Television | IVW (fixed effects)                        | 717 | 0.291  | 0.032 | 2.94E-20 | 1.338 | 1.257 | 1.423 | 1.00E-05 |
| Television | IVW (random effects)                       | 717 | 0.291  | 0.037 | 3.28E-15 | 1.338 | 1.244 | 1.438 | 1.00E-05 |
| Television | MR Egger                                   | 717 | 0.207  | 0.133 | 1.21E-01 | 1.230 | 0.947 | 1.596 | 1.00E-05 |
| Television | IVW (excluding pleiotropic education SNPs) | 703 | 0.287  | 0.032 | 6.34E-19 | 1.332 | 1.251 | 1.419 | 1.00E-05 |
| Television | IVW (excluding pleiotropic SNPs)           | 683 | 0.293  | 0.033 | 8.64E-19 | 1.340 | 1.256 | 1.430 | 1.00E-05 |
| Television | MR-PRESSO                                  | 717 | 0.291  | 0.037 | 1.22E-14 | 1.338 | 1.244 | 1.438 | 1.00E-05 |
| Television | MR-PRESSO (Outlier-corrected)              | 713 | 0.292  | 0.035 | 3.32E-16 | 1.339 | 1.251 | 1.434 | 1.00E-05 |
| Television | Multivariable (adjusted for education)     | 706 | 0.175  | 0.058 | 2.73E-03 | 1.191 | 1.062 | 1.336 | 1.00E-05 |
| Television | Weighted median                            | 717 | 0.281  | 0.049 | 8.12E-09 | 1.324 | 1.203 | 1.456 | 1.00E-05 |
| Television | Weighted mode                              | 717 | 0.277  | 0.165 | 9.34E-02 | 1.320 | 0.955 | 1.824 | 1.00E-05 |
| Computer   | IVW (fixed effects)                        | 272 | -0.105 | 0.052 | 4.51E-02 | 0.901 | 0.813 | 0.998 | 1.00E-05 |
| Computer   | IVW (random effects)                       | 272 | -0.105 | 0.061 | 8.75E-02 | 0.901 | 0.799 | 1.016 | 1.00E-05 |
| Computer   | MR Egger                                   | 268 | -0.085 | 0.053 | 1.10E-01 | 0.919 | 0.828 | 1.019 | 1.00E-05 |
| Computer   | IVW (excluding pleiotropic education SNPs) | 266 | -0.084 | 0.053 | 1.17E-01 | 0.920 | 0.828 | 1.021 | 1.00E-05 |
| Computer   | IVW (excluding pleiotropic SNPs)           | 272 | -0.159 | 0.253 | 5.31E-01 | 0.853 | 0.520 | 1.401 | 1.00E-05 |
| Computer   | MR-PRESSO                                  | 272 | -0.102 | 0.060 | 9.25E-02 | 0.903 | 0.803 | 1.017 | 1.00E-05 |
| Computer   | MR-PRESSO (Outlier-corrected)              | 270 | -0.073 | 0.057 | 2.01E-01 | 0.929 | 0.831 | 1.040 | 1.00E-05 |
| Computer   | Multivariable (adjusted for education)     | 268 | 0.013  | 0.076 | 8.66E-01 | 1.013 | 0.873 | 1.176 | 1.00E-05 |
| Computer   | Weighted median                            | 272 | -0.153 | 0.079 | 5.37E-02 | 0.858 | 0.734 | 1.002 | 1.00E-05 |
| Computer   | Weighted mode                              | 272 | -0.227 | 0.254 | 3.72E-01 | 0.797 | 0.485 | 1.310 | 1.00E-05 |
| Driving    | IVW (fixed effects)                        | 96  | 0.151  | 0.091 | 9.65E-02 | 1.163 | 0.973 | 1.391 | 1.00E-05 |
| Driving    | IVW (random effects)                       | 96  | 0.151  | 0.097 | 1.20E-01 | 1.163 | 0.961 | 1.408 | 1.00E-05 |
| Driving    | MR Egger                                   | 96  | -0.250 | 0.328 | 4.48E-01 | 0.779 | 0.409 | 1.482 | 1.00E-05 |
| Driving    | IVW (excluding pleiotropic education SNPs) | 95  | 0.139  | 0.092 | 1.30E-01 | 1.149 | 0.960 | 1.376 | 1.00E-05 |

|         |                                        |    |        |       |          |       |       |       |          |
|---------|----------------------------------------|----|--------|-------|----------|-------|-------|-------|----------|
| Driving | IVW (excluding pleiotropic SNPs)       | 93 | 0.089  | 0.093 | 3.39E-01 | 1.093 | 0.911 | 1.312 | 1.00E-05 |
| Driving | MR-PRESSO                              | 96 | 0.117  | 0.098 | 2.34E-01 | 1.124 | 0.928 | 1.362 | 1.00E-05 |
| Driving | MR-PRESSO (Outlier-corrected)          | NA | NA     | NA    | NA       | NA    | NA    | NA    | 1.00E-05 |
| Driving | Multivariable (adjusted for education) | 95 | 0.022  | 0.104 | 8.31E-01 | 1.022 | 0.834 | 1.254 | 1.00E-05 |
| Driving | Weighted median                        | 96 | 0.158  | 0.139 | 2.54E-01 | 1.171 | 0.893 | 1.537 | 1.00E-05 |
| Driving | Weighted mode                          | 96 | -0.154 | 0.378 | 6.84E-01 | 0.857 | 0.408 | 1.797 | 1.00E-05 |

*Variants at  $P < 1 \times 10^{-8}$  were used for the main analysis. IVW stands for inverse variance weighted. A two-sided  $P < 0.05$  was considered statistically significant, no adjustments were made for multiple testing.*

*$N=417,555$ ,  $N=414,546$ ,  $N=414,546$  biologically independent individuals from the UK Biobank were used to obtain effect estimates of the genetic variants associated with television watching, computer use and driving, respectively.  $N=184,305$  (60,801 cases, 123,504 controls) individuals were used to obtain effect estimates of the genetic variants associated with CAD.*

*Nsps = number of snps. CI = confidence interval.*

**Supplementary Table 5: Heterogeneity ( $I^2$ , Cochran's Q, Rucker's Q and Q-Q'), pleiotropy (MR-Egger intercept) and weak instrument statistics in the MR-Egger analyses ( $I^2_{GX}$ ) in the examined associations between sedentary behaviours and coronary artery disease.**

| exposure   | $I^2$ |            |            | Cochran's Q |     |          | Rucker's Q |     |          | Q-Q'  |    |         | MR Egger intercept |       |         | $I^2_{GX}$ | Cut-off |
|------------|-------|------------|------------|-------------|-----|----------|------------|-----|----------|-------|----|---------|--------------------|-------|---------|------------|---------|
|            | index | 95% CI min | 95% CI max | Q           | df  | P-value  | Q          | df  | P-value  | Q-Q'  | df | P-value | Intercept          | se    | P-value |            |         |
| Television | 0.340 | 0.178      | 0.471      | 190.988     | 126 | 1.67E-04 | 188.635    | 125 | 2.05E-04 | 2.353 | 1  | 0.125   | -0.007             | 0.005 | 0.214   | 0.978      | 1E-08   |
| Computer   | 0.410 | 0.098      | 0.614      | 52.513      | 31  | 9.30E-03 | 50.442     | 30  | 1.12E-02 | 2.071 | 1  | 0.150   | 0.022              | 0.020 | 0.276   | 0.975      | 1E-08   |
| Driving    | 0.000 | 0.000      | 0.000      | 2.070       | 3   | 5.60E-01 | 1.710      | 2   | 4.30E-01 | 0.360 | 1  | 0.550   | 0.026              | 0.043 | 0.610   | 0.000      | 1E-08   |
| Television | 0.317 | 0.178      | 0.433      | 265.089     | 181 | 4.61E-05 | 263.666    | 180 | 4.79E-05 | 1.423 | 1  | 0.233   | -0.004             | 0.004 | 0.326   | 0.976      | 5E-08   |
| Computer   | 0.401 | 0.149      | 0.579      | 76.815      | 46  | 2.90E-03 | 75.047     | 45  | 3.30E-03 | 1.768 | 1  | 0.184   | 0.014              | 0.013 | 0.309   | 0.974      | 5E-08   |
| Driving    | 0.023 | 0.000      | 0.797      | 4.090       | 4   | 3.90E-01 | 3.880      | 3   | 2.80E-01 | 0.220 | 1  | 0.640   | 0.020              | 0.049 | 0.709   | 0.964      | 5E-08   |
| Television | 0.287 | 0.152      | 0.401      | 298.850     | 213 | 9.38E-05 | 297.853    | 212 | 9.12E-05 | 0.997 | 1  | 0.318   | -0.003             | 0.004 | 0.400   | 0.974      | 1E-07   |
| Computer   | 0.410 | 0.187      | 0.573      | 93.287      | 55  | 9.70E-04 | 91.883     | 54  | 1.00E-03 | 1.403 | 1  | 0.236   | 0.011              | 0.012 | 0.368   | 0.974      | 1E-07   |
| Driving    | 0.000 | 0.000      | 0.000      | 4.220       | 6   | 6.47E-01 | 4.131      | 5   | 5.31E-01 | 0.089 | 1  | 0.766   | 0.006              | 0.022 | 0.778   | 0.966      | 1E-07   |
| Television | 0.276 | 0.174      | 0.366      | 512.558     | 371 | 1.46E-06 | 511.736    | 370 | 1.39E-06 | 0.823 | 1  | 0.364   | -0.002             | 0.003 | 0.441   | 0.970      | 1E-06   |
| Computer   | 0.252 | 0.048      | 0.412      | 148.440     | 111 | 1.02E-02 | 148.309    | 110 | 8.80E-03 | 0.131 | 1  | 0.717   | 0.002              | 0.007 | 0.756   | 0.968      | 1E-06   |
| Driving    | 0.520 | 0.249      | 0.694      | 52.109      | 25  | 1.16E-03 | 51.788     | 24  | 8.30E-04 | 0.322 | 1  | 0.571   | -0.006             | 0.015 | 0.703   | 0.965      | 1E-06   |
| Television | 0.270 | 0.197      | 0.336      | 980.508     | 716 | 1.54E-10 | 979.915    | 715 | 1.42E-10 | 0.592 | 1  | 0.442   | 0.001              | 0.002 | 0.511   | 0.964      | 1E-05   |
| Computer   | 0.273 | 0.152      | 0.377      | 370.000     | 271 | 3.90E-05 | 370.000    | 270 | 3.40E-05 | 0.067 | 1  | 0.800   | 0.001              | 0.003 | 0.826   | 0.961      | 1E-05   |
| Driving    | 0.127 | 0.000      | 0.330      | 108.780     | 95  | 1.60E-01 | 106.920    | 94  | 1.70E-01 | 1.860 | 1  | 0.170   | 0.006              | 0.005 | 0.204   | 0.957      | 1E-05   |

*An  $I^2$  index >25% and Cochran's  $Q$  an one-sided  $P$ -value of <0.05 were considered as an indication of heterogeneity and, as a consequence, of pleiotropy in the from the inverse variance weighted fixed effects model. A significant difference (one-sided  $P < 0.05$ ) between the Cochran's  $Q$  and Rucker's  $Q$  ( $Q-Q'$ ) was considered to indicate the MR-Egger test to be a better method to study the genetic association between the particular exposure and outcome. An MR-Egger's intercept of zero, tested using a single-sided  $P$ -value threshold of >0.05, was considered to provide evidence for absence of pleiotropic bias. An  $F_{GX}$  of >95% was considered low risk of measurement error within the MR-Egger test.*

*CI = confidence interval. Df = Degrees of freedom. Cutoff = the  $P$ -value cut-off value for the SNPs to be included in the Mendelian randomization analyses.*

**Supplementary Table 6: SNPs excluded from the outlier corrected MR-PRESSO analyses between sedentary behaviours and coronary artery disease.**

| OutlierSNP                 | RSSobs      | P-value | P-value cut-off |
|----------------------------|-------------|---------|-----------------|
| Television watching on CAD |             |         |                 |
| rs7248205                  | 1.55E-03    | <0.0473 | 1.00E-08        |
| rs7248205                  | 1.54E-03    | <0.0469 | 5,00E-08        |
| rs7248205                  | 1.54E-03    | <0.0471 | 1.00E-07        |
| rs4420638                  | 9.30E-03    | <0.0473 | 1.00E-06        |
| rs1905339                  | 1.81E-03    | <0.0477 | 1.00E-05        |
| rs4420638                  | 9.23E-03    | <0.0477 | 1.00E-05        |
| rs550057                   | 3.54E-03    | <0.0477 | 1.00E-05        |
| rs7248205                  | 1.46E-03    | 0.0477  | 1.00E-05        |
| Computer use on CAD        |             |         |                 |
| rs11708955                 | 0.001578495 | <0.05   | 1.00E-08        |
| rs11708955                 | 0.001507788 | <0.05   | 5.00E-08        |
| rs4702                     | 0.001229142 | <0.05   | 5.00E-08        |
| rs11708955                 | 0.001435054 | 0.05    | 1.00E-07        |
| rs4702                     | 0.001180032 | <0.05   | 1.00E-07        |
| rs55836224                 | 0.001514467 | 0.05    | 1.00E-07        |
| rs11708955                 | 0.001518    | <0.05   | 1.00E-06        |
| rs4702                     | 0.001242084 | <0.05   | 1.00E-06        |
| rs11708955                 | 0.001578495 | <0.05   | 1.00E-05        |
| rs11708955                 | 0.001639525 | 0.1     | 1.00E-05        |
| rs6857                     | 0.0059279   | <0.05   | 1.00E-05        |
| Driving on CAD             |             |         |                 |
| NA                         | NA          | NA      | 1.00E-08        |
| NA                         | NA          | NA      | 5,00E-08        |
| NA                         | NA          | NA      | 1.00E-07        |
| NA                         | NA          | NA      | 1.00E-06        |
| NA                         | NA          | NA      | 1.00E-05        |

*Excluded variants are shown for the analyses between television watching, computer use, driving and CAD for every P-value cutoff. MR-PRESSO does not return exact P-values in case variants are filtered and therefore non-exact P-values are shown.*

*OutlierSNP= Single nucleotide polymorphism removed from the analysis by MR-PRESSO. RSSobs= observed residual sum of squares. P-value cutoff = the cut-off value for the SNPs to be included in the Mendelian randomization analyses.*

**Supplementary Table 7: Potentially pleiotropic SNPs in the Mendelian randomization between sedentary behaviours coronary artery disease.**

| SNP                                                                      | P-value  | Pleiotropic effect(s)                       | Reference(s)                                         |
|--------------------------------------------------------------------------|----------|---------------------------------------------|------------------------------------------------------|
| <b>SNPs removed for the analysis between television watching and CAD</b> |          |                                             |                                                      |
| rs3796386                                                                | 3.20E-33 | Educational attainment                      | Davies G, 2016; Okbay A, 2016                        |
|                                                                          | 3.20E-33 | Menarche (age at onset)                     | Perry JR, 2014; Elks CE, 2010                        |
| rs12554512                                                               | 3.80E-21 | Educational attainment                      | Davies G, 2016;                                      |
|                                                                          | 3.80E-21 | Bipolar disorder                            | Hou L, 2016                                          |
| rs10189857                                                               | 6.20E-21 | Schizophrenia                               | Goes FS, 2015                                        |
| rs9718104                                                                | 9.30E-19 | Bipolar disorder                            | Kerner B, 2011                                       |
| rs6905544                                                                | 8.50E-18 | Gut microbiota (bacterial taxa)             | Bonder MJ, 2016                                      |
|                                                                          | 8.50E-18 | Educational attainment                      | Okbay A, 2016                                        |
| rs11689199                                                               | 5.50E-17 | Educational attainment                      | Okbay A, 2016; Rietveld 2013                         |
| rs17379561                                                               | 1.10E-16 | Educational attainment                      | Okbay A, 2016;                                       |
| rs1243182                                                                | 2.00E-15 | Ovarian cancer                              | Pharoah PD, 2013                                     |
|                                                                          |          | Epithelial ovarian cancer                   | Kuchenbaecker KB, 2015                               |
| rs262890                                                                 | 3.20E-15 | Educational attainment                      | Okbay A, 2016;                                       |
| rs2616830                                                                | 2.90E-14 | Educational attainment                      | Rietveld, 2013                                       |
| rs9964724                                                                | 3.30E-14 | Educational attainment                      | Davies G, 2016; Okbay A, 2016;                       |
|                                                                          |          | Neuroticism                                 | Okbay A, 2016;                                       |
| rs801733                                                                 | 7.30E-14 | Gout                                        | Nakayama A, 2016; Matsuo H, 2015                     |
| rs870151                                                                 | 8.80E-13 | Fibrinogen levels                           | de Vries PS, 2017                                    |
| rs10772643                                                               | 1.30E-12 | Educational attainment                      | Okbay A, 2016;                                       |
| rs13107325                                                               | 1.50E-12 | HDL cholesterol                             | Surakka I, 2015; Willer CJ, 2013; Teslovich TM, 2010 |
|                                                                          |          | Blood pressure                              | Wain LV, 2011                                        |
|                                                                          |          | Systolic blood pressure                     | Ehret GB, 2011                                       |
|                                                                          |          | Diastolic blood pressure                    | Ehret GB, 2011                                       |
|                                                                          |          | Hypertension                                | Ehret GB, 2011                                       |
|                                                                          |          | Body mass index                             | Locke AE, 2015; Speliotes EK, 2010                   |
|                                                                          |          | Hypertension                                | Ehret GB, 2011                                       |
|                                                                          |          | NT-proBNP levels in acute coronary syndrome | Johansson Å, 2016                                    |
|                                                                          |          | Childhood body mass index                   | Felix JF, 2015                                       |
|                                                                          |          | Schizophrenia                               | Goes FS, 2015                                        |
| rs749671                                                                 | 2.70E-12 | Hip circumference                           | Shungin D, 2015                                      |
|                                                                          |          | Blood                                       | Cooper GM, 2008                                      |
|                                                                          |          | Triglyceride levels                         | Spracklen CN, 2017                                   |
|                                                                          |          | Body mass index                             | Locke AE, 2015                                       |
|                                                                          |          | Parkinson's disease                         | Nalls MA, 2015                                       |
|                                                                          |          | Warfarin maintenance dose                   | Parra EJ, 2015; Cha PC, 2010; Takeuchi F, 2009       |
| rs3754970                                                                | 4.80E-12 | Educational attainment                      | Rietveld, 2013                                       |
| rs11810109                                                               | 5.40E-12 | Educational attainment                      | Okbay A, 2016;                                       |

|            |          |                             |                                                                                                                                                                       |
|------------|----------|-----------------------------|-----------------------------------------------------------------------------------------------------------------------------------------------------------------------|
| rs2447098  | 6.80E-12 | Autism spectrum disorder    | Kuo PH, 2015                                                                                                                                                          |
| rs6673341  | 2.20E-11 | Obesity-related traits      | Comuzzie AG, 2012                                                                                                                                                     |
| rs263771   | 3.10E-11 | Malaria                     | Band G, 2013                                                                                                                                                          |
| rs7189927  | 3.40E-11 | Obesity                     | Berndt SI, 2013                                                                                                                                                       |
|            |          | Hip circumference           | Shungin D, 2015                                                                                                                                                       |
|            |          | Body mass index             | Locke AE, 2015; Willer CJ, 2008; Speliotes, 2010                                                                                                                      |
|            |          | Body fat percentage         | Lu Y, 2016                                                                                                                                                            |
|            |          | Inflammatory bowel disease  | Liu JZ, 2015; Imielinski M, 2009                                                                                                                                      |
|            |          | Weight                      | Thorleifsson G, 2008                                                                                                                                                  |
|            |          | Waist circumference         | Shungin D, 2015                                                                                                                                                       |
|            |          | Educational attainment      | Okbay A, 2016; Rietveld, 2013                                                                                                                                         |
| rs10786658 | 4.60E-11 | Educational attainment      | Okbay A, 2016;                                                                                                                                                        |
| rs11714337 | 4.70E-11 | Educational attainment      | Okbay A, 2016;                                                                                                                                                        |
| rs7043521  | 6.50E-11 | Educational attainment      | Rietveld, 2013                                                                                                                                                        |
| rs62332760 | 8.00E-11 | Height                      | He M, 2014; Berndt SI, 2013;                                                                                                                                          |
|            |          | Inflammatory bowel disease  | Liu JZ, 2015                                                                                                                                                          |
|            |          | Ulcerative colitis          | Liu JZ, 2015                                                                                                                                                          |
| rs3135044  | 8.70E-11 | Height                      | Wood AR, 2014                                                                                                                                                         |
|            |          | Psychosis (atypical)        | Kanazawa T                                                                                                                                                            |
| rs2584597  | 2.90E-10 | Height                      | Wood AR, 2014; Carty CL, 2011; N'Diaye A, 2011; Gudbjartsson DF, 2008                                                                                                 |
|            |          | Hip circumference           | Shungin D, 2015                                                                                                                                                       |
|            |          | Body mass index             | Locke AE, 2015                                                                                                                                                        |
| rs7248205  | 3.40E-10 | Height                      | He M, 2014                                                                                                                                                            |
| rs1913808  | 3.90E-10 | Educational attainment      | Rietveld, 2013                                                                                                                                                        |
|            |          | Rheumatoid arthritis        | Jiang L, 2014                                                                                                                                                         |
| rs8756     | 5.30E-10 | Height                      | Wood AR, 2014; He M, 2014; Berndt SI, 2013; Carty CL, 2011; Lango Allen H, 2010; Liu JZ, 2010; Soranzo N 2009; Gudbjartsson DF, 2008; Weedon MN, 2008; Lettre G, 2008 |
|            |          | Birth length                | van der Valk RJ, 2014                                                                                                                                                 |
|            |          | Infant length               | van der Valk RJ, 2014                                                                                                                                                 |
|            |          | Pulse pressure              | Warren, 2017                                                                                                                                                          |
|            |          | Hip circumference           | Shungin D, 2015                                                                                                                                                       |
|            |          | Brain structure             | Stein JL, 2012                                                                                                                                                        |
|            |          | Head circumference (infant) | Taal HR, 2012                                                                                                                                                         |
|            |          | Birth weight                | Horikoshi M, 2012                                                                                                                                                     |
| rs71658797 | 6.30E-10 | Psoriasis                   | Tsoi LC, 2017                                                                                                                                                         |
| rs648044   | 1.00E-09 | Non-glioblastoma glioma     | Melin BS, 2017; Kinnersley B, 2015                                                                                                                                    |
| rs10876864 | 1.00E-09 | Vitiligo                    | Tang XF, 2012                                                                                                                                                         |
|            |          | Inflammatory skin disease   | Baurecht H, 2015                                                                                                                                                      |
|            |          | Rheumatoid arthritis        | Okada Y, 2013                                                                                                                                                         |
|            |          | Type 1 diabetes             | WTCCC, 2007                                                                                                                                                           |

|                                                                   |          |                                                                                                                                               |                                                                                                        |
|-------------------------------------------------------------------|----------|-----------------------------------------------------------------------------------------------------------------------------------------------|--------------------------------------------------------------------------------------------------------|
| rs6141814                                                         | 1.30E-09 | Ulcerative colitis                                                                                                                            | Liu JZ, 2015                                                                                           |
|                                                                   |          | Inflammatory bowel disease                                                                                                                    | Liu JZ, 2015; Jostins L, 2012                                                                          |
| rs111901094                                                       | 2.00E-09 | Height                                                                                                                                        | Wood AR, 2014                                                                                          |
| rs9834970                                                         | 3.30E-09 | Bipolar disorder                                                                                                                              | Charney AW, 2017; Ikeda M, 2017; Hou L, 2016; Goes FS, 2012; Chen DT 2011                              |
|                                                                   |          | Autism spectrum disorder, attention deficit-hyperactivity disorder, bipolar disorder, major depressive disorder, and schizophrenia (combined) | Smoller JW, 2013                                                                                       |
|                                                                   |          | Schizophrenia or bipolar disorder                                                                                                             | Ruderfer DM, 2013                                                                                      |
|                                                                   |          | Subjective response to lithium treatment                                                                                                      | Song J, 2015                                                                                           |
| rs2045147                                                         | 5.90E-09 | Extraversion                                                                                                                                  | Lo MT, 2016                                                                                            |
| rs78394231                                                        | 9.70E-09 | Airway responsiveness in COPD                                                                                                                 | Hansel NN, 2014                                                                                        |
| rs80270210                                                        | 4.00E-06 | Waist-to-hip ratio                                                                                                                            | Shungin D, 2015                                                                                        |
|                                                                   |          | Triglycerides                                                                                                                                 | Spracklen CN, 2017; Willer CJ, 2013; Teslovich TM, 2010                                                |
|                                                                   |          | HDL cholesterol                                                                                                                               | Teslovich TM, 2010                                                                                     |
|                                                                   |          | Adiponectin levels                                                                                                                            | Wu Y, 2013                                                                                             |
| <b>SNPs removed for the analysis between computer use and CAD</b> |          |                                                                                                                                               |                                                                                                        |
| rs4977839                                                         | 4.70E-19 | Educational attainment                                                                                                                        | Okbay A, 2016; Davies G, 2016                                                                          |
|                                                                   |          | Bipolar disorder                                                                                                                              | Hou L, 2016                                                                                            |
| rs13262595                                                        | 1.20E-12 | Schizophrenia                                                                                                                                 | Goes FS, 2015; Ripke S, 2014                                                                           |
| rs11708955                                                        | 4.20E-11 | Pediatric autoimmune diseases                                                                                                                 | Li YR, 2015                                                                                            |
|                                                                   |          | Gut microbiota (functional units)                                                                                                             | Bonder MJ, 2016                                                                                        |
|                                                                   |          | Cognitive function                                                                                                                            | Davies G, 2015                                                                                         |
|                                                                   |          | Educational attainment                                                                                                                        | Okbay A, 2016                                                                                          |
|                                                                   |          |                                                                                                                                               | Davies G, 2015                                                                                         |
|                                                                   |          |                                                                                                                                               | Rietveld CA, 2014                                                                                      |
|                                                                   |          | Inflammatory bowel disease                                                                                                                    | de Lange KM, 2017; Liu JZ, 2015; Jostins L, 2012                                                       |
|                                                                   |          | Crohn's disease                                                                                                                               | Franke A, 2010; Liu JZ, 2015; Barrett JC, 2009; Parkes M, 2007; WTCCC, 2007                            |
|                                                                   |          | Ulcerative colitis                                                                                                                            | de Lange KM, 2017; Liu JZ, 2015; Julià A, 2014; Anderson CA, 2011; McGovern DP, 2010; Barrett JC, 2009 |
|                                                                   |          | Primary sclerosing cholangitis                                                                                                                | Ji SG, 2016; Melum E 2010                                                                              |
| rs1448355                                                         | 1.30E-10 | Educational attainment                                                                                                                        | Okbay A, 2016                                                                                          |
| rs6129084                                                         | 9.30E-10 | Educational attainment                                                                                                                        | Okbay A, 2016                                                                                          |
| rs9477970                                                         | 1.00E-08 | Cognitive function                                                                                                                            | Davies G, 2015                                                                                         |
|                                                                   |          | Age at voice drop                                                                                                                             | Pickrell JK, 2016                                                                                      |



| SNPs removed for the analysis between driving and CAD |          |                        |                                       |
|-------------------------------------------------------|----------|------------------------|---------------------------------------|
| rs1198575                                             | 2.00E-11 | Educational attainment | Rietveld CA, 2014                     |
| rs4765541                                             | 5.10E-09 | Adiponectin levels     | Wu Y, 2013                            |
|                                                       |          | Triglyceride levels    | Spracklen CN, 2017; & Willer CJ, 2013 |
|                                                       |          | HDL cholesterol        | Willer CJ, 2013; Teslovich, TM        |
|                                                       |          | WHR adjusted for BMI   | Shungin D, 2015                       |
| rs10189857                                            | 2.40E-07 | Schizophrenia          | Goes FS, 2015                         |

*Genetic variants in LD >0.8 with previously established variants were removed from the fixed effects meta-analysis in case they were associated with a) education traits b) all traits. SNP denotes single nucleotide polymorphism*

**Supplementary Table 8: Results from TwoSample Mendelian randomization analysis between education and sedentary behaviours traits.**

| exposure  | outcome    | method                                    | nsnp | beta   | se    | P-value   | OR    | 95% CI min | 95% CI plus |
|-----------|------------|-------------------------------------------|------|--------|-------|-----------|-------|------------|-------------|
| Education | Television | Inverse variance weighted (fixed effects) | 71   | -0.535 | 0.016 | 3.40E-261 | 0.585 | 0.568      | 0.604       |
| Education | Television | MR Egger                                  | 71   | -0.657 | 0.145 | 2.46E-05  | 0.518 | 0.390      | 0.689       |
| Education | Television | MR-PRESSO                                 | 71   | -0.535 | 0.032 | 2.51E-26  | 0.585 | 0.550      | 0.623       |
| Education | Television | MR-PRESSO (Outlier-corrected)             | 67   | -0.508 | 0.028 | 6.60E-27  | 0.602 | 0.569      | 0.637       |
| Education | Television | Weighted median                           | 71   | -0.483 | 0.032 | 2.29E-51  | 0.617 | 0.579      | 0.657       |
| Education | Television | Weighted mode                             | 71   | -0.538 | 0.093 | 2.02E-07  | 0.584 | 0.486      | 0.701       |
| Education | Computer   | Inverse variance weighted (fixed effects) | 71   | 0.261  | 0.016 | 2.11E-61  | 1.298 | 1.259      | 1.339       |
| Education | Computer   | MR Egger                                  | 71   | 0.504  | 0.146 | 9.25E-04  | 1.655 | 1.244      | 2.201       |
| Education | Computer   | MR-PRESSO                                 | 71   | 0.261  | 0.032 | 1.33E-11  | 1.298 | 1.219      | 1.383       |
| Education | Computer   | MR-PRESSO (Outlier-corrected)             | 62   | 0.239  | 0.024 | 1.14E-14  | 1.269 | 1.212      | 1.329       |
| Education | Computer   | Weighted median                           | 71   | 0.234  | 0.028 | 1.85E-16  | 1.264 | 1.195      | 1.336       |
| Education | Computer   | Weighted mode                             | 71   | 0.247  | 0.060 | 9.33E-05  | 1.280 | 1.139      | 1.438       |
| Education | Driving    | Inverse variance weighted (fixed effects) | 71   | -0.077 | 0.016 | 1.37E-06  | 0.926 | 0.897      | 0.955       |
| Education | Driving    | MR Egger                                  | 71   | -0.136 | 0.088 | 0.126231  | 0.873 | 0.735      | 1.037       |
| Education | Driving    | MR-PRESSO                                 | 71   | -0.077 | 0.019 | 0.000137  | 0.926 | 0.892      | 0.961       |
| Education | Driving    | MR-PRESSO (Outlier-corrected)             | 70   | -0.072 | 0.018 | 0.000201  | 0.931 | 0.898      | 0.965       |
| Education | Driving    | Weighted median                           | 71   | -0.063 | 0.024 | 0.008228  | 0.939 | 0.896      | 0.984       |
| Education | Driving    | Weighted mode                             | 71   | -0.033 | 0.052 | 0.520389  | 0.967 | 0.874      | 1.070       |

*Variants at  $P < 5 \times 10^{-8}$  were used for the MR analysis. A two-sided  $P < 0.05$  was considered statistically significant for the Mendelian randomization analyses, no correction was made for multiple testing.*

*Nsps = number of snps. OR = odds ratio. CI = confidence interval.*

**Supplementary Table 9: Heterogeneity ( $I^2$ , Cochran's Q, Rucker's Q and Q-Q'), pleiotropy (MR-Egger intercept) and weak instrument statistics in the MR-Egger analysis ( $I^2_{GX}$ ) in the examined associations between education and sedentary behaviours.**

| outcome    | $I^2$ |            |            | Cochran's Q |    |          | Rucker's Q |    |          | Q-Q'   |    |          | MR Egger intercept |       |         | $I^2_{GX}$ |
|------------|-------|------------|------------|-------------|----|----------|------------|----|----------|--------|----|----------|--------------------|-------|---------|------------|
|            | index | 95% CI min | 95% CI max | Q           | df | P-value  | Q          | df | P-value  | Q      | df | P-value  | Intercept          | se    | P-value |            |
| Television | 0.762 | 0.702      | 0.810      | 290         | 70 | 3.00E-29 | 290        | 69 | 4.80E-29 | 3.1    | 1  | 7.80E-02 | 0.002              | 0.003 | 0.394   | 0.974      |
| Computer   | 0.761 | 0.701      | 0.810      | 290         | 70 | 3.80E-29 | 280        | 69 | 1.80E-27 | 12     | 1  | 5.60E-04 | -0.005             | 0.003 | 0.092   | 0.974      |
| Driving    | 0.302 | 0.060      | 0.481      | 100         | 70 | 1.03E-02 | 100        | 69 | 9.40E-03 | 0.6732 | 1  | 4.12E-01 | 0.001              | 0.002 | 0.497   | 0.974      |

*An  $I^2$  index >25% and Cochran's Q an one-sided P-value of <0.05 were considered as an indication of heterogeneity and, as a consequence, of pleiotropy in the from the inverse variance weighted fixed effects model. A significant difference (one-sided  $P < 0.05$ ) between the Cochran's Q and Rucker's Q (Q-Q') was considered to indicate the MR-Egger test to be a better method to study the genetic association between the particular exposure and outcome. An MR-Egger's intercept of zero, tested using a single-sided P-value threshold of >0.05, was considered to provide evidence for absence of pleiotropic bias. An  $I^2_{GX}$  of >95% was considered low risk of measurement error within the MR-Egger test.*

*CI = confidence interval. Df = Degrees of freedom.*

**Supplementary Table 10: SNPs excluded from the outlier corrected MR-PRESSO analyses between education and sedentary behaviours.**

| <b>OutlierSNP</b>                | <b>RSSobs</b> | <b>P-value</b> |
|----------------------------------|---------------|----------------|
| Education on television watching |               |                |
| rs112634398                      | 4.10E-04      | 0.0486         |
| rs11712056                       | 1.59E-04      | <0.0486        |
| rs148734725                      | 1.19E-04      | <0.0486        |
| rs34072092                       | 2.32E-04      | <0.0486        |
| Education on computer use        |               |                |
| rs11210860                       | 7.21E-05      | 0.0486         |
| rs13294439                       | 2.00E-04      | <0.0486        |
| rs1402025                        | 8.56E-05      | 0.0486         |
| rs148734725                      | 7.99E-05      | <0.0486        |
| rs17167170                       | 1.06E-04      | <0.0486        |
| rs2431108                        | 1.38E-04      | <0.0486        |
| rs34072092                       | 2.32E-04      | <0.0486        |
| rs4863692                        | 1.20E-04      | <0.0486        |
| rs9320913                        | 1.16E-04      | <0.0486        |
| Education on driving             |               |                |
| rs2568955                        | 7.78E-05      | 0.0486         |

*Excluded variants are shown for the analyses between education and television watching, computer use and driving. MR-PRESSO does not return exact P-values in case variants are filtered and therefore non-exact P-values are shown.*

*OutlierSNP= Single nucleotide polymorphism removed from the analysis by MR-PRESSO. RSSobs= observed residual sum of squares. P-value cutoff = the cut-off value for the SNPs to be included in the Mendelian randomization analyses.*

**Supplementary Table 11:  $Q_{x1}$  and  $Q_{x2}$  and  $Q_a$  in the two-sample multivariable MR between sedentary behaviours, education and CAD.**

| Exposure   | $Q_{x1}$ and $Q_{x2}$ |          |     |           | $Q_a$ |     |           |          | P-value cut off |
|------------|-----------------------|----------|-----|-----------|-------|-----|-----------|----------|-----------------|
|            | $Q_{x1}$              | $Q_{x2}$ | df  | Min $Q_x$ | $Q_a$ | df  | Min $Q_a$ | P-value  |                 |
| Television | 423.5                 | 387.1    | 124 | 99.3      | 188.3 | 123 | 98.4      | 1.40E-04 | 1.00E-08        |
| Television | 638.8                 | 566.4    | 177 | 147.2     | 261.1 | 176 | 146.3     | 3.26E-05 | 5.00E-08        |
| Television | 710.4                 | 623.0    | 209 | 176.5     | 295.0 | 208 | 175.6     | 6.79E-05 | 1.00E-07        |
| Television | 1095.3                | 984.7    | 365 | 321.7     | 505.0 | 364 | 320.8     | 1.33E-06 | 1.00E-06        |
| Television | 2025.9                | 1704.3   | 704 | 643.4     | 950.5 | 703 | 642.5     | 1.17E-09 | 1.00E-05        |
| Computer   | 173.7                 | 139.5    | 30  | 18.5      | 46.0  | 29  | 17.7      | 2.37E-02 | 1.00E-08        |
| Computer   | 229.2                 | 181.6    | 45  | 30.6      | 74.1  | 44  | 29.8      | 3.05E-03 | 5.00E-08        |
| Computer   | 283.1                 | 232.3    | 54  | 38.1      | 91.6  | 53  | 37.3      | 7.90E-04 | 1.00E-07        |
| Computer   | 654.7                 | 444.3    | 110 | 86.8      | 146.3 | 109 | 85.9      | 9.99E-03 | 1.00E-06        |
| Computer   | 2067.7                | 959.3    | 266 | 229.2     | 355.3 | 265 | 228.3     | 1.75E-04 | 1.00E-05        |
| Driving    | 21.2                  | 15.8     | 2   | 0.1       | 1.6   | 1   | 0.0       | 2.10E-01 | 1.00E-08        |
| Driving    | 23.7                  | 17.3     | 3   | 0.4       | 3.8   | 2   | 0.1       | 1.49E-01 | 5.00E-08        |
| Driving    | 35.7                  | 25.2     | 5   | 1.1       | 3.8   | 4   | 0.7       | 4.29E-01 | 1.00E-07        |
| Driving    | 299.4                 | 157.8    | 24  | 13.8      | 44.1  | 23  | 13.1      | 5.17E-03 | 1.00E-06        |
| Driving    | 1415.8                | 349.3    | 93  | 71.8      | 96.6  | 92  | 70.9      | 3.51E-01 | 1.00E-05        |

$Q_{x1}$  and  $Q_{x2}$  are measures of weak-instrument bias in a two-sample multivariable MR setting.  $Q_a$  is a measure of heterogeneity. We estimated the critical value for the  $\chi^2$  (min  $Q_x$  and min  $Q_a$ ) distribution using the amount of SNPs minus respectively two and three degrees of freedom at an one-sided P-value of 0.05.  
Df = Degrees of freedom.

**Supplementary Table 12: Results of the additional two-sample Mendelian randomization analyses between sedentary behaviours and cardiovascular risk factors, and subsequent multivariable Mendelian randomization analyses on CAD.**

| exposure2                                              | outcome      | method | nsnp | beta   | se    | P-value   | OR    | 95% CI min | 95% CI plus | P-value cut-off |
|--------------------------------------------------------|--------------|--------|------|--------|-------|-----------|-------|------------|-------------|-----------------|
| <i>Leisure television watching as primary exposure</i> |              |        |      |        |       |           |       |            |             |                 |
| NA                                                     | BMI          | IVW    | 144  | -2.197 | 0.061 | 1.35E-282 | NA    | NA         | NA          | 1.00E-08        |
| BMI                                                    | CAD          | MV-MR  | 127  | 0.245  | 0.099 | 1.30E-02  | 1.277 | 1.053      | 1.549       | 1.00E-08        |
| NA                                                     | DM2          | IVW    | 144  | -0.838 | 0.072 | 5.22E-31  | 0.433 | 0.375      | 0.498       | 1.00E-08        |
| DM2                                                    | CAD          | MV-MR  | 127  | 0.270  | 0.086 | 1.64E-03  | 1.310 | 1.107      | 1.550       | 1.00E-08        |
| NA                                                     | SBP          | IVW    | 144  | -2.767 | 0.209 | 5.44E-40  | NA    | NA         | NA          | 1.00E-08        |
| SBP                                                    | CAD          | MV-MR  | 127  | 0.334  | 0.083 | 5.45E-05  | 1.397 | 1.188      | 1.643       | 1.00E-08        |
| NA                                                     | DBP          | IVW    | 144  | -1.672 | 0.106 | 2.90E-56  | NA    | NA         | NA          | 1.00E-08        |
| DBP                                                    | CAD          | MV-MR  | 127  | 0.343  | 0.085 | 5.60E-05  | 1.409 | 1.193      | 1.665       | 1.00E-08        |
| NA                                                     | Hypertension | IVW    | 144  | -0.620 | 0.048 | 7.52E-38  | 0.538 | 0.490      | 0.591       | 1.00E-08        |
| Hypertension                                           | CAD          | MV-MR  | 127  | 0.225  | 0.085 | 8.21E-03  | 1.253 | 1.060      | 1.481       | 1.00E-08        |
| NA                                                     | HDL          | IVW    | 144  | 0.112  | 0.005 | 9.40E-119 | NA    | NA         | NA          | 1.00E-08        |
| HDL                                                    | CAD          | MV-MR  | 127  | 0.260  | 0.094 | 5.79E-03  | 1.297 | 1.078      | 1.561       | 1.00E-08        |
| NA                                                     | LDL          | IVW    | 144  | 0.001  | 0.011 | 9.64E-01  | NA    | NA         | NA          | 1.00E-08        |
| LDL                                                    | CAD          | MV-MR  | 127  | 0.365  | 0.073 | 6.20E-07  | 1.440 | 1.248      | 1.662       | 1.00E-08        |
| NA                                                     | Triglyceride | IVW    | 144  | -0.255 | 0.013 | 5.72E-83  | NA    | NA         | NA          | 1.00E-08        |
| Triglyceride                                           | CAD          | MV-MR  | 127  | 0.307  | 0.094 | 1.13E-03  | 1.359 | 1.130      | 1.635       | 1.00E-08        |
| NA                                                     | TC           | IVW    | 144  | 0.054  | 0.015 | 2.62E-04  | NA    | NA         | NA          | 1.00E-08        |
| TC                                                     | CAD          | MV-MR  | 127  | 0.359  | 0.073 | 9.73E-07  | 1.432 | 1.240      | 1.654       | 1.00E-08        |
| <i>Leisure computer use as primary exposure</i>        |              |        |      |        |       |           |       |            |             |                 |
| NA                                                     | BMI          | IVW    | 34   | 0.117  | 0.128 | 3.59E-01  | NA    | NA         | NA          | 1.00E-08        |
| BMI                                                    | CAD          | MV-MR  | 32   | -0.212 | 0.154 | 1.68E-01  | 0.809 | 0.598      | 1.093       | 1.00E-08        |
| NA                                                     | DM2          | IVW    | 34   | -0.079 | 0.150 | 5.96E-01  | 0.924 | 0.689      | 1.239       | 1.00E-08        |
| DM2                                                    | CAD          | MV-MR  | 32   | -0.213 | 0.158 | 1.78E-01  | 0.808 | 0.593      | 1.102       | 1.00E-08        |

|                                    |              |       |    |        |       |          |       |       |       |          |
|------------------------------------|--------------|-------|----|--------|-------|----------|-------|-------|-------|----------|
| NA                                 | SBP          | IVW   | 34 | 4.069  | 0.436 | 1.02E-20 | NA    | NA    | NA    | 1.00E-08 |
| SBP                                | CAD          | MV-MR | 32 | -0.116 | 0.185 | 5.30E-01 | 0.890 | 0.620 | 1.280 | 1.00E-08 |
| NA                                 | DBP          | IVW   | 34 | 1.430  | 0.221 | 8.93E-11 | NA    | NA    | NA    | 1.00E-08 |
| DBP                                | CAD          | MV-MR | 32 | -0.199 | 0.169 | 2.40E-01 | 0.820 | 0.588 | 1.142 | 1.00E-08 |
| NA                                 | Hypertension | IVW   | 34 | 0.147  | 0.100 | 1.42E-01 | 1.158 | 0.952 | 1.409 | 1.00E-08 |
| Hypertension                       | CAD          | MV-MR | 32 | -0.194 | 0.153 | 2.03E-01 | 0.823 | 0.610 | 1.111 | 1.00E-08 |
| NA                                 | HDL          | IVW   | 34 | -0.010 | 0.010 | 3.10E-01 | NA    | NA    | NA    | 1.00E-08 |
| HDL                                | CAD          | MV-MR | 32 | -0.216 | 0.155 | 1.65E-01 | 0.806 | 0.594 | 1.093 | 1.00E-08 |
| NA                                 | LDL          | IVW   | 34 | 0.077  | 0.024 | 1.32E-03 | NA    | NA    | NA    | 1.00E-08 |
| LDL                                | CAD          | MV-MR | 32 | -0.175 | 0.160 | 2.75E-01 | 0.840 | 0.613 | 1.150 | 1.00E-08 |
| NA                                 | Triglyceride | IVW   | 34 | 0.076  | 0.028 | 5.53E-03 | NA    | NA    | NA    | 1.00E-08 |
| Triglyceride                       | CAD          | MV-MR | 32 | -0.246 | 0.156 | 1.15E-01 | 0.782 | 0.576 | 1.062 | 1.00E-08 |
| NA                                 | TC           | IVW   | 34 | 0.104  | 0.031 | 8.12E-04 | NA    | NA    | NA    | 1.00E-08 |
| TC                                 | CAD          | MV-MR | 32 | -0.177 | 0.161 | 2.73E-01 | 0.838 | 0.611 | 1.149 | 1.00E-08 |
| <i>Driving as primary exposure</i> |              |       |    |        |       |          |       |       |       |          |
| NA                                 | BMI          | IVW   | 4  | 0.022  | 0.382 | 9.53E-01 | NA    | NA    | NA    | 1.00E-08 |
| BMI                                | CAD          | MV-MR | 4  | 0.962  | 0.194 | 6.69E-07 | 2.617 | 1.791 | 3.824 | 1.00E-08 |
| NA                                 | DM2          | IVW   | 4  | -0.677 | 0.449 | 1.32E-01 | 0.508 | 0.211 | 1.225 | 1.00E-08 |
| DM2                                | CAD          | MV-MR | 4  | 0.840  | 0.289 | 3.58E-03 | 2.317 | 1.316 | 4.080 | 1.00E-08 |
| NA                                 | SBP          | IVW   | 4  | 0.227  | 1.298 | 8.61E-01 | NA    | NA    | NA    | 1.00E-08 |
| SBP                                | CAD          | MV-MR | 4  | 0.981  | 0.337 | 3.61E-03 | 2.666 | 1.377 | 5.160 | 1.00E-08 |
| NA                                 | DBP          | IVW   | 4  | 0.203  | 0.658 | 7.57E-01 | NA    | NA    | NA    | 1.00E-08 |
| DBP                                | CAD          | MV-MR | 4  | 0.964  | 0.336 | 4.11E-03 | 2.621 | 1.357 | 5.061 | 1.00E-08 |
| NA                                 | Hypertension | IVW   | 4  | 0.110  | 0.299 | 7.14E-01 | 1.116 | 0.621 | 2.006 | 1.00E-08 |
| Hypertension                       | CAD          | MV-MR | 4  | 1.000  | 0.340 | 3.25E-03 | 2.720 | 1.397 | 5.295 | 1.00E-08 |
| NA                                 | HDL          | IVW   | 4  | 0.222  | 0.030 | 1.39E-13 | NA    | NA    | NA    | 1.00E-08 |
| HDL                                | CAD          | MV-MR | 4  | 0.719  | 0.077 | 6.06E-21 | 2.053 | 1.767 | 2.385 | 1.00E-08 |
| NA                                 | LDL          | IVW   | 4  | -0.233 | 0.071 | 1.09E-03 | NA    | NA    | NA    | 1.00E-08 |
| LDL                                | CAD          | MV-MR | 4  | 0.826  | 0.317 | 9.12E-03 | 2.283 | 1.228 | 4.248 | 1.00E-08 |
| NA                                 | Triglyceride | IVW   | 4  | -0.447 | 0.082 | 5.58E-08 | NA    | NA    | NA    | 1.00E-08 |

|              |     |       |   |        |       |          |       |       |       |          |
|--------------|-----|-------|---|--------|-------|----------|-------|-------|-------|----------|
| Triglyceride | CAD | MV-MR | 4 | 0.776  | 0.231 | 8.02E-04 | 2.172 | 1.380 | 3.419 | 1.00E-08 |
| NA           | TC  | IVW   | 4 | -0.122 | 0.092 | 1.86E-01 | NA    | NA    | NA    | 1.00E-08 |
| TC           | CAD | MV-MR | 4 | 0.953  | 0.360 | 8.06E-03 | 2.593 | 1.281 | 5.248 | 1.00E-08 |

*Traditional cardiovascular risk factors included body mass index, history of diabetes, systolic blood pressure, diastolic blood pressure, history of hypertension and lipid profile. First, MR analyses between sedentary behaviours and the secondary phenotype were performed. Next, a multivariable MR between sedentary behaviours, the secondary trait and CAD was performed. Only variants at  $P < 1 \times 10^{-8}$  were used. IVW stands for inverse variance weighted (in this case, fixed effects models were performed), MV-MR stands for multivariable Mendelian randomization.*

*BMI stands for body mass index, DM2 for a history of diabetes mellitus type 2, SBP for systolic blood pressure, DBP for diastolic blood pressure, hypertension for a medical history of hypertension, HDL for high density lipoprotein, LDL for low density lipoprotein and TC for total cholesterol. NA stands for not applicable, and is provided in case 1) there was no secondary exposure 2) the outcome was a linear trait and odds ratios could not be provided.*

*Exposure2 = secondary exposure, nsps = number of snps, OR = odd ratio, CI = confidence interval.*



## Supplementary Discussion

Several sensitivity MR analyses were performed to investigate the causal association between sedentary behaviours and CAD, with each of these tests harboring their own strengths and weaknesses. First of all, it is important that genetic variants do explain enough variance of its original trait. We therefore assessed weak instruments bias by examining the F-statistics, which were above 10 for all genetic variants indicating that current analyses do not suffer from weak instrument bias.  $I^2_{GX}$  indicated that the MR-Egger estimates of driving may have suffered from weak instrument bias in the main analysis and these results should therefore be interpreted with caution.

Although weak instrument bias was carefully assessed, our analyses do not provide evidence for the specificity of the discovered genetic instruments for its phenotype. The genetic variants could still exert an effect on CAD through generic pathways or correlated traits as education, i.e. pleiotropy. Indeed it would be remarkable if a neurologically driven trait as sedentary behaviours, shown to be correlated with other neurologically driven traits, would not influence these traits or vice versa. Regular inverse variance weighted MR analyses should in such a scenario be interpreted with caution, as this would violate its' assumptions. We believe such pleiotropy to be unlikely for several reasons.

First of all, we assessed heterogeneity and thus potential horizontal pleiotropy using the Rucker framework<sup>1</sup> and found evidence for balanced pleiotropy in the association between television watching and CAD. In this scenario, a causal effect is properly estimated using an inverse variance weighted random effects model. The causal estimate between television watching and CAD remained similar to the main analyses, only with slightly broader confidence intervals. To further explore horizontal pleiotropy, we performed more stringent analyses using the latest MR methods, including MR-Egger<sup>2</sup>, exclusion of potentially pleiotropic variants in MR-IVW analysis and MR-PRESSO<sup>3</sup>.

Secondly, we assessed whether pleiotropy was due to horizontal or vertical pleiotropy using multiple multivariable MR in which we corrected for correlated traits including education or other cardiovascular risk factors<sup>4</sup>. This test has its weaknesses (i.e. potential bias in the case of overlapping risk factors and potential to suffer from weak instrument bias<sup>5</sup>), but also strengths (i.e. control for potential pleiotropy due to correlated traits including education or other cardiovascular risk factors). The multivariable MR in which we corrected for education showed a similar effect as the main analyses, although the confidence intervals were broader. Although the genetics underlying television watching and education are clearly intertwined (as shown by the high genetic correlations), there seems to be an independent effect of television watching on CAD in our estimates.  $Q_{x1}$  and  $Q_{x2}$  indicated that all primary exposures (sedentary behaviours) and the secondary exposure (education) did not suffer from weak instrument bias in any of the analyses.  $Q_a$  indicated heterogeneity and thus potential pleiotropy in the associations between television watching (and computer use) with CAD when already corrected for education. This indicates that we cannot rule out that other traits are on the causal pathway between television watching and CAD, whether it is due to vertical pleiotropy (as discussed below) or horizontal pleiotropy due to currently uninvestigated traits. Based on the fact that only neurological pathways are highlighted for television watching, it would be surprising to see that television watching immediately increases risk of CAD. We therefore performed additional multivariable MR analyses, proven to be a proper approach for mediation analyses<sup>6</sup>, to investigate whether traditional cardiovascular risk factors were on the causal pathway to CAD. Indeed, we did observe vertical pleiotropy when correcting for these risk factors, as the total effect of television watching on CAD was attenuated compared to the direct effect. In case the association between television watching and CAD is true, this is likely mediated by common cardiovascular risk factors as BMI, lipid profile and blood pressure, in line with results from previous observational studies<sup>7-10</sup>. It is important to note that the attenuation of the effect in the multivariate MR corrected for traditional cardiovascular risk factors is possibly accentuated by assessing the secondary exposures' effect estimates within the same cohort. The multivariable MR's do not prove uniqueness of the instruments used in the MR analyses. If any, it further supports overlap with neurologically driven traits as education and BMI. Our results indicate horizontal pleiotropy with education and vertical pleiotropy with common cardiovascular risk factors. However, they do provide evidence for independence of the association for education and possible pathways in which television watching exerts its effect on CAD.

Thirdly, pleiotropy through general (for example, mitochondrial function) or purely cardiovascular pathways (for example, coagulation) is not likely, as all the genetic variants for television watching showed enrichment for pathways involved in neurological development and were mainly enriched in neural tissue. Any pleiotropy is therefore most likely to be caused by neurological traits (for example, education or obesity inducing behaviours). We therefore performed rigorous sensitivity analyses to assess pleiotropy through these traits, as described above.

Lastly, we obtained evidence for an association for an association between television watching and CAD through multiple approaches, i.e. triangulation of evidence<sup>11</sup>. This is essential as different approaches harbor different

strengths and weaknesses. For example, observational studies are often hampered by confounding and reverse causation, which MR studies overcome. On the other hand, MR studies could potentially be affected by weak instrument bias and pleiotropy. The evidence for a possible causal relationship (as found in the MR) between television watching and CAD is therefore strengthened by congruent results with previous research<sup>12</sup> and current observational analyses.

In short, both observational and all MR analyses were consistent and therefore pointed to a causal interpretation of the association between television watching and CAD. We emphasize that no definitive tests exists to verify true causality and we stress careful interpretation of the results in the light of the potential complicated relationship between education and disease<sup>13</sup>.

## Supplementary References

1. Bowden, J. *et al.* A framework for the investigation of pleiotropy in two-sample summary data Mendelian randomization. *Stat. Med.* **36**, 1783–1802 (2017).
2. Bowden, J., Davey Smith, G. & Burgess, S. Mendelian randomization with invalid instruments: effect estimation and bias detection through Egger regression. *Int. J. Epidemiol.* **44**, 512–525 (2015).
3. Verbanck, M., Chen, C.-Y., Neale, B. & Do, R. Detection of widespread horizontal pleiotropy in causal relationships inferred from Mendelian randomization between complex traits and diseases. *Nat. Genet.* **50**, 693–698 (2018).
4. Sanderson, E., Davey Smith, G., Windmeijer, F. & Bowden, J. An examination of multivariable Mendelian randomization in the single-sample and two-sample summary data settings. *Int. J. Epidemiol.* (2018). doi:10.1093/ije/dyy262
5. Holmes, M. V & Davey Smith, G. Challenges in Interpreting Multivariable Mendelian Randomization: Might “Good Cholesterol” Be Good After All? *Am. J. Kidney Dis.* **71**, 149–153 (2018).
6. Carter, A. R. *et al.* Mendelian randomisation for mediation analysis: current methods and challenges for implementation. *bioRxiv* 835819 (2019). doi:10.1101/835819
7. Benatti, F. B. & Ried-Larsen, M. The Effects of Breaking up Prolonged Sitting Time: A Review of Experimental Studies. *Med. Sci. Sports Exerc.* **47**, 2053–2061 (2015).
8. Ainsworth, B. E. *et al.* 2011 compendium of physical activities: A second update of codes and MET values. *Med. Sci. Sports Exerc.* **43**, 1575–1581 (2011).
9. Frydenlund, G., Jørgensen, T., Toft, U., Pisinger, C. & Aadahl, M. Sedentary leisure time behavior, snacking habits and cardiovascular biomarkers: The Inter99 Study. *Eur. J. Prev. Cardiol.* **19**, 1111–1119 (2012).
10. Altenburg, T. M., de Kroon, M. L. A., Renders, C. M., HiraSing, R. & Chinapaw, M. J. M. TV Time but Not Computer Time Is Associated with Cardiometabolic Risk in Dutch Young Adults. *PLoS One* **8**, e57749 (2013).
11. Lawlor, D. A., Tilling, K. & Smith, G. D. Triangulation in aetiological epidemiology. *Int. J. Epidemiol.* **45**, 1866–1886 (2016).
12. Wijndaele, K. *et al.* Television Viewing and Incident Cardiovascular Disease: Prospective Associations and Mediation Analysis in the EPIC Norfolk Study. *PLoS One* **6**, e20058 (2011).
13. Davies, N. M. *et al.* Multivariable two-sample Mendelian randomization estimates of the effects of intelligence and education on health. *Elife* **8**, (2019).
