# Supplementary material for: Genome-wide association studies and Mendelian randomization analyses for leisure sedentary behaviours
Source: PubMed Central journal article supplement (PMC7174427; doi:10.1038/s41467-020-15553-w), 2020-04-21
Supplement: 41467_2020_15553_MOESM17_ESM.pdf [file 41467_2020_15553_MOESM17_ESM.pdf]

**Title:** Supplementary Data 1:

**Description:** 193 Novel genome-wide sedentary behaviour SNPs (.xlsx).

**Title:** Supplementary Data 2:

**Description:** Genetic correlation between sedentary behaviours, and previously performed GWAS's (.xlsx).

**Title:** Supplementary Data 3:

**Description:** Sedentary behaviour variants associated with previously discovered variants (.xlsx).

**Title:** Supplementary Data 4:

**Description:** List of coding variants (.xlsx).

**Title:** Supplementary Data 5:

**Description:** List of functional eQTL genes (.xlsx).

**Title:** Supplementary Data 6:

**Description:** List of DEPICT genes (.xlsx).

**Title:** Supplementary Data 7:

**Description:** Results of gene sets discovered by DEPICT for sedentary behaviour and sedentary behaviour traits separately (.xlsx).

**Title:** Supplementary Data 8:

**Description:** Results of enriched tissue sets discovered by DEPICT for sedentary behaviour and sedentary behaviour traits separately (.xlsx).

**Title:** Supplementary Data 9:

**Description:** Genetic association estimates for the association between sedentary behaviours and coronary artery disease (.xlsx).

**Title:** Supplementary Data 10:

**Description:** F-statistics and R2 of all instruments for the Mendelian randomization analysis between sedentary behaviours and coronary artery disease (.xlsx).

**Title:** Supplementary Data 11:

**Description:** Inverse variance weighted Mendelian randomization estimates for the association between education and sedentary behaviours (.xlsx).

**Title:** Supplementary Data 12:

**Description:** Genetic association estimates for the two-sample regression-based multivariable Mendelian randomization analyses estimating the effect of sedentary behaviours on coronary artery disease, adjusted for education (.xlsx).

**Title:** Supplementary Data 13:

**Description:** Genetic association estimates for the two-sample regression-based multivariable Mendelian randomization analyses estimating the effect of sedentary behaviours on coronary artery disease, adjusted for cardiovascular risk factors. (.xlsx).
